# Supplementary material
Source: PubMed Central journal article supplement (PMC4914144)
Supplement: pnas.1523358113.sapp.pdf [file pnas.1523358113.sapp.pdf]

## 1 SI Appendix

2

### 3 1. Lateral and vertical carbon fluxes induced by erosion

#### 4 1.1 Lateral carbon fluxes (F1 and F2)

##### 5 1.1.1 Soil Organic Carbon (SOC) erosion (F1)

6 The erosional component of soil organic carbon (SOC) was derived using the  
7 following equation:

$$8 \quad E_C = C_{SOC-surf} v_{ero} A_{ero} \quad (1)$$

9 where  $E_C$  (kg/yr) is the amount of organic carbon loss due to soil erosion,  $C_{SOC-surf}$   
10 (kg/m<sup>3</sup>) is the organic carbon content in the surficial soil layer of 4.5 cm (see Section  
11 2.2 for soil data format),  $v_{ero}$  (m/yr) is the water erosion rate, and  $A_{ero}$  (m<sup>2</sup>) is the  
12 erosional area. This approach assumes that the enrichment ratio  $E_r = 1$ . In other words  
13 it is assumed that the proportion of SOC in the soil is the same as that which is eroded  
14 and therefore transported away from the eroded site. We recognize that there are  
15 situations in which  $E_r > 1$  and that the amount of SOC eroded is larger than the SOC  
16 content because SOC is removed preferentially. However, there is little data presently  
17 available with which to parameterize our model.

18

##### 19 1.1.2 SOC deposition (F2)

20 The SOC depositional component was similarly assessed from:

$$21 \quad D_C = C_{SOC-Surf} v_{dep} A_{dep} \quad (2)$$

22 where  $D_C$  (kg/yr) is the amount of organic carbon loss due to soil erosion,  $v_{dep}$  (m/yr)  
23 is the deposition rate, and  $A_{dep}$  (m<sup>2</sup>) is the depositional area. We assume that there is  
24 no preferential sorting of material and that all of the eroded SOC is deposited at the  
25 same location.

26 *Sediment Delivery Ratio (SDR)* is defined as the ratio of sediment transport ( $T_S$ ,  
27 kg/yr) to the total amount of soil erosion ( $E_S$ , kg/yr):

$$28 \quad SDR = \frac{T_S}{E_S} \quad (3)$$

29 Since deposition is the difference between soil erosion and sediment transport, and the  
30 enrichment ratio is assumed to be 1, equation (2) can be converted into:

$$31 \quad D_C = E_C \cdot (1 - SDR) \quad (4)$$

32 Based on observations of *SDR* in nine major river basins in China, Jing et al. (1)  
33 established a positive relationship between the five grades of soil erosion severity and  
34 *SDR* in the range 0.1–1 throughout China at the scale of small watersheds (~1 km<sup>2</sup>)  
35 (Table S3). This positive relationship is mainly due to the feedback of sediment  
36 delivery on soil erosion: with smaller *SDR*, more sediment accumulates within its  
37 source watershed, which would prohibit further erosion as the depositional area  
38 approaches full capacity. The observed *SDR* values and erosion grades in other

39 representative areas have also been collected from various sources in the literature to  
40 support the relationship obtained by Jing et al. (1) (Table S4). Thus, the magnitude of  
41 SOC deposition in all cells (polygons) can be calculated using equation (4).

42

### 43 1.1.3 Validation of lateral carbon fluxes

44 Data concerning SOC removal and deposition in small watersheds have been  
45 collected to validate the modeled F1 and F2 in this paper. Table S5 shows that the  
46 values of F1 and F2 agree well with those from previous studies carried out in  
47 different regions of China.

48

## 49 *1.2 Carbon recovery at the eroded area (F3)*

### 50 1.2.1 Identifying the erosion-induced CO<sub>2</sub> fluxes in small watersheds

51 Van Oost et al. (2) designed a novel method to separate the component of CO<sub>2</sub>  
52 flux that is solely induced by soil erosion in small watersheds. According to Schmidt  
53 et al. (3), the molecular structure of Soil Organic Matter (SOM) plays a secondary  
54 role in determining the carbon decomposition and persistence, and the ecosystem  
55 properties (i.e. biotic and abiotic environments) determine the carbon stability.  
56 Furthermore, the biochemical decomposition and persistence are far from equilibrium,  
57 especially in the eroding area (4). To quantify the CO<sub>2</sub> exchange induced by soil  
58 erosion in the eroding area, Van Oost et al. (2) first assume an equivalent situation

59 between biochemical composition and decomposition, and simulate the change of  
 60 SOC ( $\Delta C_{sim}$ , g C/m<sup>2</sup>); then by subtraction from the observed SOC content ( $\Delta C_{obs}$ , g  
 61 C/m<sup>2</sup>), Van Oost et al. (2) estimate the carbon exchange induced by other  
 62 environmental variables (primarily soil erosion) as the dynamic recovery:

$$63 \quad F_3 = (\Delta C_{obs} - \Delta C_{sim}) / T \quad (5)$$

64 in which  $\Delta C_{obs}$  is regarded as the difference between the initial carbon stock  $C_0$  (g  
 65 C/m<sup>2</sup>) and that after  $T$  years,  $C_{T-E}$  (g C/m<sup>2</sup>):

$$66 \quad \Delta C_{obs} = C_{T-E} - C_0 \quad (6)$$

67 Note that  $\Delta C_{sim}$  is determined through mathematical simulation of the evolution  
 68 of stock during the process of soil erosion without extra CO<sub>2</sub> exchange induced by  
 69 erosion.  $\Delta C_{sim}$  is divided into two parts: (1)  $F_{con-de}$  (g C/m<sup>2</sup>; *con* stands for composition,  
 70 and *de* stands for decomposition), the carbon changes due to  
 71 composition/decomposition of SOC under stable conditions (i.e. without erosion), and  
 72 (2)  $F_{ero-l}$  (g C/m<sup>2</sup>; *l* stands for lateral), lateral carbon loss due to erosion, excluding a  
 73 component reflecting the interaction between soil erosion and CO<sub>2</sub>  
 74 emission/sequestration:

$$75 \quad \Delta C_{sim} = F_{con-de} + F_{ero-l} \quad (7)$$

76 By subtracting  $\Delta C_{sim}$  from  $\Delta C_{obs}$ , the erosion-induced CO<sub>2</sub> exchange is quantified. In  
 77 non-eroded areas, changes to soil carbon storage are caused by biochemical  
 78 composition and decomposition of organic carbon. Therefore,  $F_{con-de}$  can be calculated

79 as the difference between initial carbon storage and carbon stock during the  $T$ -th year  
 80 within the stable area of a watershed  $C_{T-NE}$  (g C/m<sup>2</sup>):

$$81 \quad F_{con-de} = C_{T-NE} - C_0 \quad (8)$$

82 Lateral carbon movement due to soil erosion  $F_{ero-l}$  can be calculated in terms of  
 83 erosion rate  $v_{ero}$  (m/yr), duration of erosion period  $T$  (yr), and carbon content in the  
 84 top layer directly affected by soil erosion (~20 cm) in the  $t$ -th year,  $c_{top(t)}$  (g C/m<sup>3</sup>),  
 85 i.e.,

$$86 \quad F_{ero-l} = \sum_{t=1}^T v_{ero} c_{top(t)} \quad (9)$$

87 Combining equations (1) to (9), the total erosion-induced CO<sub>2</sub> flux during T years,  
 88  $F_{ero-v}$  (g C/m<sup>2</sup>;  $v$  stands for vertical), can be calculated according to:

$$89 \quad F_{ero-v} = C_{T-E} - C_{T-NE} - \sum_{t=1}^T v_{ero} c_{top(t)} \quad (10)$$

90 Note that  $c_{top(t)}$  changes with time:

$$91 \quad c_{top(t)} = \frac{c_{top(t-1)} D_{top} + (c_{bel(t-1)} - c_{top(t-1)}) v_{ero}}{D_{top}} \quad (11)$$

92 The parameters  $C_{T-E}$ ,  $C_{T-NE}$ ,  $c_{top(t)}$ ,  $c_{top(t-1)}$ ,  $c_{bel(t-1)}$  and  $D_{top}$  are determined from the  
 93 vertical profiles of organic carbon in both stable and erosional areas of the watershed.

94  $v_{ero}$  is derived from the <sup>137</sup>Cs content in soil profiles. Therefore, the annual  
 95 erosion-induced CO<sub>2</sub> source/sink across the whole watershed during erosion period  $T$   
 96 (yr),  $F_3$  (g C/yr), is:

97 
$$F3 = \left( \sum_{i=1}^N F_{ero-v(i)} A_{(i)} \right) / T \quad (12)$$

98 where  $N$  is the number of soil samples in the watershed, and  $A_{(i)}$  is the controlling area  
99 of the  $i$ -th sample.

100 Using the above method, Van Oost et al. (2) successfully determined  
101 erosion-induced CO<sub>2</sub> fluxes in small basins. Since discrimination is needed between  
102 stable and erosional areas in a given watershed over the years of erosion history, it is  
103 difficult to upscale the method to other, larger regions lacking such information.  
104 Moreover, the use of <sup>137</sup>Cs to determine erosion velocities is too expensive to  
105 implement in larger regions. Although the mapping of <sup>137</sup>Cs data and the estimation of  
106 net soil redistribution is possible over large areas (5, 6), we took a modelling approach  
107 to tackle this problem across China.

108

### 109 1.2.2 Improved Method

110 A key problem in the assessment of erosion-induced CO<sub>2</sub> fluxes in large-scale  
111 basins arises from data availability. A modified approach is thus needed to avoid the  
112 necessity for discrimination between stable and erosional areas. Moreover,  
113 alternatives are needed for determination of erosion rates.

114 Instead of choosing the first year since erosion as the beginning of the simulation  
115 period, the  $N$ -th year after erosion is selected as the start point (Fig. S1). Similarly we  
116 assume that erosion does not exert any impact on the original CO<sub>2</sub> exchange process,

117 soil carbon composition/decomposition and lateral movement of organic carbon are  
 118 simulated as two independent processes, with the modeled carbon storage being  $C_{unc}$   
 119 (g C/m<sup>2</sup>). Then, the coupled carbon storage ( $C_{coup}$ , g C/m<sup>2</sup>) is modeled including the  
 120 impact of erosion on CO<sub>2</sub> emission/sequestration (Fig. S1). The difference in carbon  
 121 storage under the two circumstances is regarded as the erosion-induced CO<sub>2</sub> flux in  
 122 the erosional area,  $F3$  (g C/yr). The parameters  $C_{unc}$ ,  $C_{coup}$  and  $F3$  are obtained  
 123 respectively from:

$$124 \quad \frac{dC_{unc}}{dt} = I_B - k_O C_{unc} \quad (13)$$

$$125 \quad \frac{dC_{coup}}{dt} = I_B - (k_O + k_E) C_{coup} + c_{bel} v_{ero} \quad (14)$$

126 and

$$127 \quad F3 = \frac{C_{coup} - C_{unc}}{T} A_{ero}. \quad (15)$$

128 It should be noted that  $C_{coup}$  and  $C_{unc}$  are the carbon contents within corresponding  
 129 layers in the original soil profile. In Equations (13)~(15),  $I_B$  (g C/m<sup>2</sup>/yr) is the  
 130 carbon input to the soil, and  $k_O$  (1/yr) is the turnover rate of soil carbon with respect to  
 131 decomposition in absence of erosion.  $k_E$  (1/yr) is the erosion rate of soil carbon,  
 132 obtained by calculating the ratio of soil erosion rate (m/yr) to the depth of carbon in  
 133 the top soil layer which dominates erosion. Both  $C_{coup}$  and  $C_{unc}$  are effectively carbon  
 134 storages in the top layers, considering that there is no difference in the coupled and  
 135 uncoupled carbon storages in the deeper layers. These levels are seldom affected by

136 soil erosion, and provide no contribution to the erosion-induced CO<sub>2</sub> sink from the  
 137 deeper layers.  $c_{bel}$  (g C/m<sup>3</sup>) is the carbon concentration at the bottom of the top layer.  
 138 Since the vertical distribution of organic carbon usually obeys an exponential law,  $c_{bel}$ ,  
 139 is expressed:

$$140 \quad c_{bel} = (c_0 - c_{min})e^{-kv_{ero}t} + c_{min} \quad (16)$$

141 where  $c_0$  (g C/m<sup>3</sup>),  $c_{min}$  (g C/m<sup>3</sup>), and  $k$  (1/m) can be determined by measurements of  
 142 carbon concentration in different layers of vertical soil profiles.  $c_0$  is averaged over  
 143 the whole top layer (therefore uniform within the top layer, and is equal to  $C_{bel}$  when  $t$   
 144 = 0). Dividing all terms in equation (16) by  $c_0$ , then:

$$145 \quad \frac{c_{bel}}{c_0} = \frac{c_{min}}{c_0} + (1 - \frac{c_{min}}{c_0})e^{-kv_{ero}t} \quad (17)$$

146 We then divide  $\frac{c_{min}}{c_0}$  in the range of 0.01–0.5 using an incremental step of 0.01.

147 Then, for each  $\left(\frac{c_{min}}{c_0}\right)_i$  ( $i = 1 \dots 50$ ), the measured carbon concentration is fitted to

148 the  $l$  layers of samples:  $\left(\frac{cz_j}{c_0}, z_j\right)_{ref}$  ( $j = 1 \dots l$ ), and the best-fit  $k_i$  parameterized using

149 the least squares method. From all 50 pairs of  $\left(\frac{c_{min}}{c_0}, k\right)_i$ , the case is selected that

150 leads to the minimum root-mean-square-error (RMSE), which is usually less than

151 40%. For the thin soil layer,  $\frac{c_{min}}{c_0}$  is set to 0.01. Fig. S2 illustrates the entire

152 parameterization process.  $A_{ero}$  and  $T$  in equation (15) represent the erosional area of

153 the studied watershed and the length of the simulation period, respectively.

154 Berhe et al. (7) used a humification coefficient to evaluate the fraction of net



155 primary production (NPP) entering into the soil, with the remainder of NPP assumed  
156 to be rapidly decomposed and released to the atmosphere without participating in the  
157 processes of soil erosion and terrestrial deposition. To apply this method, an estimate  
158 of humification coefficient is required. However, little information about the  
159 humification coefficient is available for different ecosystem types in China. The  
160 approach taken herein assumes that all NPP enters the soil carbon pool (i.e.  $I_B = \text{NPP}$ ),  
161 and considers the uncertainty by using a  $k_O$  already including the initial rapid carbon  
162 loss, which is different to that of Berhe et al. (7). In Section 3, different values for the  
163 humification coefficient (< 10% in grasslands and forests, and < 30% in agricultural  
164 systems) have been assumed to analyze the uncertainty. Moreover, the “initial rapid C  
165 loss” hypothesis should be viewed with caution because newly produced  
166 photosynthate may become invulnerable to rapid decomposition under certain  
167 circumstances including physical protection (e.g. soil burial, waterlogging). In such  
168 cases, the photosynthate may become a C substrate for soil erosion, i.e. NPP. It should  
169 be noted that as SOC declines due to continuous erosion, and  $k_O$  from these models  
170 could be over-estimated (8). The sensitivity of  $k_O$  is tested in Section 3. We also  
171 assume that erosion has no effect on the rate of SOC decomposition, and the related  
172 uncertainty is discussed in Section 3.

173 Since NPP is linearly dependent on crop yield, such that

$$174 \quad \text{NPP} = \frac{\text{CropYield}}{HI} DF CF, \quad (18)$$

175 where  $HI$  is the Harvest Index,  $DF$  is the Dry matter Fraction, and  $CF$  is the Carbon

176 Fraction. The increase in crop yield per unit area recorded in all provinces (Table S6)  
177 implies that NPP was maintained even under severe soil erosion. Therefore, it is  
178 reasonable to assume that NPP is slightly affected by soil erosion, even in severely  
179 eroded areas like the Loess Plateau (9) and Southwest China (10).

180 Using equations (13) to (17), the erosion-induced CO<sub>2</sub> fluxes are determined  
181 from the storage and vertical profile of soil organic carbon, erosion rate, carbon pool  
182 turnover rate, and net primary production (NPP).

183 The modified method simplifies the discrimination of stable and erosional areas,  
184 and avoids having to estimate the year in which erosion commenced. Moreover, the  
185 majority of model inputs such as erosion rate, soil carbon storage, carbon pool  
186 turnover rate and NPP can be extracted from either national survey databases or  
187 global carbon cycle models. Comparison of data requirements for the two methods  
188 (Table S7) shows closer data accessibility by the modified method for assessment at  
189 regional scale. It should also be noted that the modified method does not take into  
190 account the DOC leaching term, which could contribute another source of vertical  
191 carbon loss. This uncertainly will also be discussed in Section 3.

192

### 193 1.2.3 Scale-up approach based on minimum polygons

194 Although estimation of dynamic replacement can be undertaken at the scale of  
195 small watersheds using the modified method, estimation over larger regions remains a  
196 problem. Scale-up from local to regional scales is a key issue in extrapolation to large

197 areas. Here we propose an efficient approach based on minimum polygons identified  
198 as continuous small areas with uniformly distributed geographical factors (11, 12),  
199 such as soil organic carbon content, erosion grade, carbon pool turnover rate, and NPP.  
200 By overlaying these factors at different layers (Table S8) in GIS software (Fig. S3),  
201 tens of thousands of polygons are generated, the majority of which have areas less  
202 than 1 km<sup>2</sup>. Thus, the total erosion-induced CO<sub>2</sub> sequestration can be obtained by  
203 summing up the CO<sub>2</sub> fluxes in each of the polygons.

204

#### 205 1.2.4 Comparison between Van Oost et al.'s (2) and modified methods

206 Since it is difficult to observe the CO<sub>2</sub> flux induced by erosion in small  
207 watersheds, we test the modified method by comparing its outputs with those from  
208 Van Oost et al.'s (2) method for 8 watersheds in Europe, 2 watersheds in the US, and  
209 5 watersheds in China. The <sup>137</sup>Cs and SOC data for watersheds in Europe and the  
210 US are taken from the Supplementary Material of Van Oost et al. (2). The 5  
211 representative small watersheds in China are located in the black soil region, the red  
212 soil region, and the purple soil region. The spatial distribution of soils in China is  
213 shown in Fig. S4. Watershed No.1, with an area of 13 ha, is located in the black soil  
214 area of Jilin Province (125°52'E, 44°43'N) which has a cold (average temperature:  
215 4.4°C), humid (annual precipitation: 534 mm) climate. Under the influence of the  
216 continental monsoon, 70% of the precipitation occurs between June and August.  
217 Watershed No.1 is severely eroded because of the long cultivation history of corn

218 dating back to 1903, noting that the cultivation depth is about 20 cm (13).  
219 Watershed No.2 is located in the black soil area of Heilongjiang Province with  
220 average temperature of 0.5–4.0 °C and humid climate (mean annual precipitation of  
221 500–600 mm). Under the influence of the continental monsoon, 80% of the  
222 precipitation is concentrated from June to September. Bean is the main crop in this  
223 region (14). However, Watersheds No.3 and No.4 are all within Jianyang County  
224 (104°28'E, 30°26'N) in the eastern part of Sichuan Basin and comprise purple soil  
225 which is cultivated by rotating wheat, corn and potato crops (15, 16). These two  
226 watersheds are characterized by very hilly topography (average slope of 16%) and  
227 relatively low altitude (400–587 m), and their climate is hot and humid with average  
228 temperature of 17.4°C and annual precipitation of 872 mm. Watershed No.5 is  
229 covered by red soil containing relatively little organic matter, located in the Liujiashan  
230 Farm (109°20'E, 33°44'N) in Yujiang County, Jiangxi Province. This watershed is  
231 characterized by low (altitude: 45–60 m), hilly (slope: 5–18%) topography. The  
232 average temperature is 17.8°C. The annual precipitation is 1795 mm, 50% of which  
233 occurs in the monsoon season from April to June. The main crops are tea, peanuts,  
234 and carrots, which have been cultivated since the 1950s (17).

235 Table S9 lists the collected SOC and <sup>137</sup>Cs data together with the relevant  
236 parameters reported in the literature for the 15 test watersheds. Comparison of outputs  
237 from both Van Oost et al.'s (2) and the present modified model are given in Table S9  
238 and Fig. S1. The RMSE for the Chinese watersheds in China is 19.3%, and that for  
239 other watersheds is 39.7%. The average RMSE for the total is 31.7 %. Although the

240 tested watersheds are widely distributed in Europe, the US, and China, the total  
241 number of basins considered is small in terms of statistical significance, and more *in*  
242 *situ* data are needed in future. To further test the modified method, a sensitivity  
243 analysis is reported in Section 3.

244

### 245 1.3 Erosion-induced CO<sub>2</sub> source in the depositional area (F4)

246 It is commonly accepted that erosion induces a CO<sub>2</sub> source in the depositional  
247 area (18, 19). As the eroded soil is deposited, part of the top soil layer enters into the  
248 1<sup>st</sup> layer of sub-soil (19). Therefore, the depth of the layer next to the top layer  
249 becomes thick. Decomposition of the newly buried C-rich soil brings about an extra  
250 CO<sub>2</sub> source. Thus, F4 can be calculated based on the total eroded soil of the  
251 polygon:

$$252 \quad F4 = C_{SOC-surf} \bar{v}_{ero} k_{O-subsoil} (1 - SDR) \quad (19)$$

253 where  $\bar{v}_{ero}$  is the mean erosion rate of the polygon (i.e.  $v_{ero} A_{ero} / A_{polygon}$ ; and  $A_{polygon}$  is  
254 the area of the polygon);  $k_{O-subsoil}$  is the turnover rate of the subsoil layer;  $SDR$  is a  
255 conceptual parameter defined as the ratio of the total sediment exported out of the  
256 polygon to the total eroded soil within the polygon. Since the turnover rate decreases  
257 exponentially with depth (19):

$$258 \quad k_{o-z} = k_{o-0} \exp(-u_r z) \quad (20)$$

259 where  $u_r$  is set to 2.6, the decomposition rate of the newly buried SOC is 40–60 % of  
260 the top layer, noting that  $z$  is usually within the range of 0.2–0.3 m.

261 Although the assumption of exponential decay is more acceptable close to steady  
262 state conditions, the rate of decay of the soil C reservoir is no longer exponential in a  
263 depositional landform associated with grassland that is naturally eroding (7).  
264 Nevertheless, buried SOC remains conserved over the decadal time period considered  
265 herein, as found by Van Oost et al. (2, 20) and Wang et al. (21). This is because the  
266 decay rates diminish substantially in burial zones, with the primary control factor  
267 provided by the physical environment, not the SOC chemistry. Hence, it is  
268 reasonable to use an exponential decay law.

269

#### 270 *1.4 Enhanced decomposition of SOC during sediment transport (F5)*

271 Soil aggregates detach during erosion, and break down further when delivered to  
272 depositional land, making it easier to decompose organic carbon in sediments.  
273 Meanwhile, the presence of autochthonous carbon in the aquatic environment  
274 enhances SOC mineralization. Unlike Jacinthe et al. (22) who reported that up to  
275 50% SOC degraded into CO<sub>2</sub> in an incubation experiment lasting 100 days, Wang et  
276 al. (21) found that hardly any additional CO<sub>2</sub> was released owing to erosion.  
277 Following Guenet et al. (23) we assume that the difference between decomposition *in*  
278 *situ* and during transport could be as much as 63%. Here, we evaluate the  
279 erosion-induced CO<sub>2</sub> flux during sediment transport by assuming that 63% more SOC

280 is degraded into CO<sub>2</sub> in water than in the soil layers. Other studies have also reported  
281 that the additional emission is very small (e.g. Van Hemelryck et al., 24). Hence, the  
282 approach taken herein is consistent with the understanding of erosional effects on  
283 decomposition rates on land.

284

### 285 *1.5 VLC Ratio*

286 The Vertical to Lateral Carbon (VLC) ratio is defined as the ratio of the recovery  
287 CO<sub>2</sub> sink (F3) to SOC removal (F1) in eroding areas. VLC reflects the potential of a  
288 certain area to recover from the loss of SOC.

289

## 290 **2. Data**

### 291 *2.1 National Survey on Soil Erosion*

292 Two detailed national soil erosion surveys were accomplished in 1995–1996 and  
293 2010–2012, and the data can be downloaded from  
294 (<http://cese.pku.edu.cn/chinaerosion/>). The first national survey combined remote  
295 sensing (TM) images and field survey data to provide spatial distribution information  
296 on primary geographical and environmental factors such as erosive force, topography  
297 and vegetation. As a result, six soil erosion grades were classified over the entire  
298 country (25) (Fig. S5). Furthermore, the second national survey utilized Chinese Soil  
299 Loss equation (26) (CSLE), with inputs of topographical, land use and remote-sensing

300 information as well as field survey data on conservation measures, vegetation cover  
 301 and meteorology (32,364 small watersheds covering 1% of the water erosion area in  
 302 China). Erosion rates were calculated from:

$$303 \quad A = R \cdot K \cdot L \cdot S \cdot B \cdot E \cdot T . \quad (21)$$

304 where  $A$  is the erosion rate (t/hm<sup>2</sup>/yr),  $R$  is the rainfall erosivity (MJ mm/hm<sup>2</sup>ha),  $K$ ,  
 305 the soil erodibility index, refers to the soil loss of a unit plot that is 22.1 m long and 9  
 306 % steep (unit: t hm<sup>2</sup> h/hm<sup>2</sup> JM mm),  $L$  is the slope length factor (-),  $S$  is the slope  
 307 factor (-),  $B$  is the biological conservation measures factor,  $E$  is the engineering  
 308 conservation measures factor, and  $T$  is the tillage conservation measures factor.  $R$   
 309 appears in terms of the average rainfall-erosivity over 24 half-months, i.e.  $R_{hm}$  (MJ  
 310 mm/hm<sup>2</sup>ha):

$$311 \quad R_{hm} = 0.184 \sum_{i=1}^n (P_d I_{10d})_i \quad (22)$$

312 where  $P_d$  is the daily rainfall amount (mm) and  $I_{10d}$  is the daily maximum 10min  
 313 rainfall intensity (mm/h).  $K$  is estimated according to its definition above (Fig.  
 314 S6(a)).

315 In equation (21),  $L$  is determined from:

$$316 \quad L = (\lambda / 22.13)^m \quad (23)$$

317 where  $\lambda$  is the slope-length (m) and  $m$  is the slope length exponent identified as:

$$318 \quad m = 0.6(1 - e^{-35.835 \tan \theta}) \quad (24)$$



319  $S$  is determined from:

$$320 \quad S = \begin{cases} 10.8 \sin \theta + 0.03 & \theta \leq 5^\circ \\ 16.8 \sin \theta - 0.5 & \theta > 5^\circ \end{cases} \quad (25)$$

321 where  $\theta$  is the slope gradient.

322  $E$  is expressed as:

$$323 \quad E = \left(1 - \frac{s_t}{s_0} a\right) \left(1 - \frac{s_d}{s_0} b\right) \quad (26)$$

324 where  $s_t$  is the area of terraces (km<sup>2</sup>);  $s_d$  is the control area of check dams (km<sup>2</sup>);  $s_0$  is  
325 the area of sub-basins (km<sup>2</sup>); and  $a$  and  $b$  are sediment-reduction coefficients  
326 associated with terraces and check dams.

327  $B$  and  $T$  are obtained from:

$$328 \quad B = \sum_{i=1}^n M_i / M_{0i}, \quad T = \sum_{i=1}^n M_i / M_{0i} \quad (27)$$

329 where  $M_i$  (t/hm<sup>2</sup>) is the soil loss under certain conservation measures in the  $i$ -th year,  
330 and  $M_{0i}$  (t/hm<sup>2</sup>) is the soil loss of a bare field in the  $i$ -th year. For easier application,  
331 the factor  $B$  is often determined according to land-use type and vegetation cover (27).  
332 Table S10 lists references to the validation of CSLE for watersheds in different  
333 regions of China.

334 Precipitation is a key parameter affecting soil erosion. Two different series of  
335 climate data are chosen for corresponding calculations based on national surveys

336 undertaken in 1995–1996 and 2010–2012. According to equations (1–2, 19), F1, F2,  
337 F4, and F5 are linearly dependent on erosion rate, and F3 also has a positive  
338 correlation with erosion rate (see sensitivity analysis in Section 3). Therefore, the  
339 weighting of climate on the five carbon fluxes can be reflected by its impact on  
340 erosion rate. Miao et al. (28) suggest that climate change contributes 17% and 48% of  
341 the decrease of sediment yield in the upper and middle reaches of Yellow River Basin,  
342 respectively.

343       Considering that uncertainties exist in both the sources of data (DEM, survey on  
344 *B*, *E*, and *T* factors) and the model employed, the national surveys reported soil  
345 erosion grades (Slight, Light, Moderate, Intense, Extremely Intense, and Severe  
346 Erosion) instead of actual erosion rates. Table S11 summarizes areas corresponding to  
347 different erosion grades in the 31 provinces in China, derived from reports released by  
348 the Ministry of Water Resources, PR China (29). Table S3 lists the conversion rules  
349 from erosion grades to erosion rates. Note that each specific erosion grade  
350 corresponds to a range of erosion rates,  $v_{ero}$  is determined as the medium value within  
351 the range. The uncertainty induced by such simplification has been included by  
352 presenting the error bars of the relevant estimates (see Table S1). Section 3 also  
353 examines the sensitivity of  $v_{ero}$ .

354

## 355 2.2 Vertical distribution of soil organic carbon

356       The soil organic carbon content of 8 vertical layers (i.e. 0–0.045, 0.045–0.091,

357 0.091–0.166, 0.166–0.289, 0.289–0.493, 0.493–0.829, 0.829–1.383 and 1.383–2.296  
358 m) for each of 8980 soil profiles was obtained from a Global Soil Dataset based on  
359 the Soil Map of the World and various regional and national soil databases  
360 (<http://globalchange.bnu.edu.cn/research/soil2>). The soil-type-and-polygon-linkage  
361 method was used to derive the spatial distribution of soil properties (30), in which  
362 data describing soil properties were interpolated from natural soil horizons to standard  
363 layers using equal-area quadratic smoothing spline functions. This has previously  
364 been proved to be of advantage in predicting the depth function of soil properties (30).  
365 The smoothing parameter of the spline was set as 0.1. The spline was used to estimate  
366 parameters for various soil properties in the standard layers, while negative values  
367 were set to zero. The resolution was 30 arc-seconds (about 1 km at the equator). The  
368 dataset was then used to derive parameters describing the vertical profile of SOC,  
369 namely  $C_{\text{SOC-top}}$ ,  $C_{\text{min}}/C_0$  and  $k$ , following the process presented in Fig. S2.

370

### 371 *2.3 Carbon pool turnover rates and net primary production*

372 The turnover rate of the carbon pool refers to the ratio of soil respiration to total  
373 carbon storage ( $k_0$  in equations (13) and (14)). Net primary production (NPP) is  
374 regarded as the total input of carbon from vegetation to the soil carbon pool ( $I_B$  in  
375 equations (13) and (14)). These two parameters are extracted from the outputs of ten  
376 state-of-the-art global carbon cycle models, namely CLM4C (31, 32), CLM4CN (31,  
377 32), HYLAND-v4 (33), LPJ (34), LPJ\_GUESS (35), ORCHIDEE (36), SDGVM (37,

378 38), TRIFFID (41), VEGAS-2.1 (42), OCN (43), and averaged over the period from  
379 1980s to present. Mean values and variances of NPP and  $k_o$  derived from the ten  
380 models are presented in Table S12.

381

#### 382 *2.4 Precipitation*

383 Precipitation data (Fig. S6(b)) were collected from the website of China  
384 Meteorological Administration (<http://www.cma.gov.cn/2011qx fw/2011qsjg x/>). 675  
385 stations were included and the data series covered from 1995 to 2012 (Fig. S7).

386

#### 387 *2.5 Vegetation cover*

388 Data on vegetation cover were extracted from the 1:1,000,000 map of China's  
389 Vegetation Cover published in 2007. This dataset is regarded as an integrated outcome  
390 based on long-term observations, which could reflect the general condition of  
391 vegetation cover distribution from 1980s to 1990s (Fig. S6(c)). Herein, vegetation  
392 type was not directly used for calculation of carbon fluxes; instead its influence has  
393 been implicitly accounted in the final C budget estimation via soil erosion rate.

394

#### 395 *2.6 Parameters derived from the national-scale datasets*

396 Table S13 summarizes the parameters used to calculate the five fluxes in the

397 datasets presented above.

398

### 399 **3. Uncertainty and sensitivity analysis**

#### 400 *3.1 Dynamic replacement in the erosional area*

401 This approach assumes that all NPP enters into the soil carbon pool, and adopts a  
402  $k_O$  coefficient that includes the effect of initial rapid carbon decomposition. In the  
403 present uncertainty analysis, this assumption is tested by assuming a humification  
404 coefficient of 30% (as in an agricultural ecosystem) and 10% (as in grassland and  
405 forest ecosystems). Correspondingly, 30% and 10% of the  $k_O$  dataset is adopted,  
406 because the lower carbon input requires a lower carbon turnover rate to reach  
407 equilibrium (see Section 2.1 in the Supporting Material in Van Oost et al. (2) which  
408 showed that  $k_O$  changes proportionally with  $I_B$  when the carbon pool is in a balanced  
409 state). The results show that F3 reduced by 7.5% and 13.7% when  $I_B$  decreased by  
410 70% and 90%. The variation in the estimate of NPP also reflects the uncertainty  
411 induced by different levels of carbon input. Here, values for NPP were extracted  
412 from the CLM4C, CLM4CN, HYLAND-v4, LPJ, LPJ\_GUESS, ORCHIDEE,  
413 SDGVM, TRIFFID, VEGAS-2.1 and OCN models, and the erosion-induced CO<sub>2</sub>  
414 fluxes in China calculated accordingly. Table S12 shows that inputs from the  
415 ORVHIDEE model with the largest mean NPP (0.42 kg/m<sup>2</sup>/yr) produced the largest  
416 total carbon sequestration of 64.6 Mt C/yr based on the erosion data from the 2<sup>nd</sup>  
417 National Survey in 1995–1996 and 53.2 Mt C/yr based on the erosion data from the

418 4<sup>th</sup> National Survey in 2010–2012. However, parameters derived from the CLM4C  
419 model with the lowest mean NPP (0.30 kg/m<sup>2</sup>/yr) generated the lowest CO<sub>2</sub>  
420 absorption of 28.1 Mt C/yr and 29.2 Mt C/yr based on the two national surveys in  
421 1995–1996 and 2010–2012, respectively. The SDGVM, HYLAND-v4 and  
422 LPJ\_GUESS models with NPP close to the average level of the ten models gave  
423 results that most closely fitted the average values of CO<sub>2</sub> absorption, with errors less  
424 than 5%. Parameters from SDGVM and HYLAND-v4 models led to best fits, whereas  
425 those from CLM4C, ORCHIDEE, VEGAS-2.1 and OCN models produced results  
426 with errors > 20%. It should be noted that as SOC declines due to continuous  
427 erosion,  $k_O$  from these models could be over-estimated (8). However, since the mean  
428  $k_O$  of each model changes within a narrow range (0.02–0.04 yr<sup>-1</sup>),  $k_O$  should contribute  
429 little to the variation of the outputs of the ten models.

430 A sensitivity analysis has been carried out to examine the uncertainty induced by  
431 NPP. The results indicate that NPP is positively correlated to CO<sub>2</sub> flux; when NPP is  
432 altered by 20%, the relative change in CO<sub>2</sub> sink intensity is about 29%. Similarly,  
433 the erosion rate is also positively related to CO<sub>2</sub> flux, and a 20% change in erosion  
434 rate would lead to a 23% change in CO<sub>2</sub> sink intensity. However, the carbon  
435 turnover rate and carbon content in the surface layers are negatively correlated, and  
436 less sensitive. A 20% change in carbon turnover rate and surface soil carbon content  
437 leads to 13% and 9% changes in CO<sub>2</sub> sink intensity, respectively.

438 Another source of uncertainty is introduced by the assumption that erosion does  
439 not influence the rate of SOC decomposition, which is problematic at the timescale of

440 decades; instead, a conceptual model should link  $k_O$  and  $k_E$ . However, little  
441 quantitative information is yet available to develop such a model. Furthermore,  
442 studies have shown that accurate predictions of both SOC density profiles and SOC  
443 quality can be obtained from simulations where  $k_O$  is assumed to be independent of  $k_E$   
444 (see Wang et al., (42), Nadeu et al., (43), Lugato et al., (44)). We therefore suggest  
445 that the assumption of independence is reasonable, particularly for a large-scale  
446 modelling assessment.

447 As another source of vertical loss, DOC leaching from topsoil has been ignored in  
448 the present approach. As suggested by Li et al. (45), Long et al. (46), and Gou et al.  
449 (47), the DOC leaching potential ranges from 3.8–8.7 kg/ha (in other words,  
450 0.55–0.96 Mt C/yr). Based an empirical formula previously developed for hillslope  
451 croplands in China, which assumed that DOC leaching depends directly on  
452 precipitation, the DOC leaching potential throughout China has also been estimated to  
453 be 0.94 Mt C/yr, using the yearly averaged precipitation data from 1995 to 2012.  
454 The foregoing results indicate that the potential DOC leaching flux in China is  
455 negligible compared with F3.

456

### 457 *3.2 Carbon content in the surficial layer*

458 The carbon content in the surficial layer is regarded as constant (obtained from  
459 the surficial 4.5 cm layer of soil obtained from the national survey) to calculate F1, F2,  
460 and F4. In areas of the Erosion Grade 2 or 3 (erosion rate = 0.74–1.90 mm/yr,

461 1.90–3.70 mm/yr, respectively) which cover the majority of the surface area of China,  
462 the 4.5 cm surficial layer has not been eroded during the period of interest, and it is  
463 reasonable to assume that the top layer carbon content remains constant. However,  
464 in areas where erosion rate larger than 0.37 mm/a, F1, F2, and F4 could possibly be  
465 overestimated, consequently leading to a relatively lower VLC ratio. This implies  
466 that the lateral carbon fluxes could be lower, and the ability of recovering lost carbon  
467 could be even higher in North China (inclusive of the Loess Plateau) and Southwest  
468 China (in the Upper Yangtze) (48).

469

#### 470 **References**

- 471 1. Jing K, Wang WZ, Zheng FL (2005) *Soil Erosion and Environment in China*  
472 (Science Press, Beijing). (in Chinese)
- 473 2. Van Oost K, et al. (2007) The impact of agricultural soil erosion on the global  
474 carbon cycle. *Science* 318: 626–629.
- 475 3. Schmidt MWI, et al. (2011) Persistence of soil organic matter as an ecosystem  
476 property. *Nature* 478(7367): 49–56.
- 477 4. Berhe AA, Kleber M (2013) Erosion, deposition, and the persistence of soil  
478 organic matter: mechanistic considerations and problems with terminology. *Earth*  
479 *Surf Process Landf* 38: 908–912.
- 480 5. Chappell A, Rossel RAV, Loughran R (2011) Spatial uncertainty of  
481 Cs-137-derived net (1950s-1990) soil redistribution for Australia. *J Geophys Res*



- 482        *Atmosph* 116(F4): F4015–F4036.
- 483    6. Chappell A, Webb NP, Rossel RAV, Bui E (2014) Australian net (1950s-1990)  
484        soil organic carbon erosion: implications for CO<sub>2</sub> emission and land-atmosphere  
485        modeling. *Biogeosciences* 11(18): 5235–5244.
- 486    7. Berhe AA, Harden JW, Torn MS, Harte J (2008) Linking soil organic matter  
487        dynamics and erosion-induced terrestrial carbon sequestration at different  
488        landform positions. *J Geophys Res* 113(G4): 4647–4664.
- 489    8. Chappell A, Baldock J, Sanderman J (2016) The global significance of omitting  
490        soil erosion from soil organic carbon cycling schemes. *Nat Clim Change* 6:  
491        184–191.
- 492    9. Xu Y, Yang B, Liu GB, Liu PL (2009) Topographic differentiation simulation of  
493        crop yield and soil and water loss on the Loess Plateau. *J Geogr Sci* 19: 331–339.
- 494    10. Su ZA, Zhang JH, Nie XJ (2010) Effect of soil erosion on soil properties and crop  
495        yields on slopes in the Sichuan Basin, China. *Pedosphere* 20: 736–746.
- 496    11. Ni JR, Li XX, Borthwick AGL (2008) Soil erosion assessment based on  
497        minimum polygons in the Yellow River basin, China. *Geomorphology* 93:  
498        233–252.
- 499    12. Ni JR, Wu A, Li TH, Yue Y, Borthwick AGL (2014) Efficient soil loss assessment  
500        for large basins using smart coded polygons. *J Environ Inform* 23: 47–57.
- 501    13. Fang HY, Li QY, Sun LY, Cai QG (2012) Using <sup>137</sup>Cs to study spatial patterns of  
502        soil erosion and soil organic carbon (SOC) in an agricultural catchment of the  
503        typical black soil region, Northeast China. *J Environ Radioactiv* 112: 125–132.

- 504 14. Liang AZ, et al. (2009) Estimation of total erosion in cultivated Black soils in  
505 northeast China from vertical profiles of soil organic carbon. *Eur J Soil Sci* 60:  
506 223–229.
- 507 15. Zhang JH, Ni SJ, Su ZA (2012) Dual roles of tillage erosion in lateral SOC  
508 movement in the landscape. *Eur J Soil Sci* 63: 165–176.
- 509 16. Zhang JH, Li FC (2013) Soil redistribution and organic carbon accumulation  
510 under long-term (29 years) upslope tillage systems. *Soil Use Manage* 29:  
511 365–373.
- 512 17. Tang XY, Yang H, Du MY, Zhao QG, Li RY (2003) Soil redistribution  
513 investigations by combined use of soil <sup>137</sup>Cs and selected chemical properties.  
514 *Soil Sci Plant Nutr* 49: 557–566.
- 515 18. Liu S, Bliss N, Sundquist E, Huntington TG (2003) Modeling carbon dynamics in  
516 vegetation and soil under the impact of soil erosion and deposition. *Global*  
517 *Biogeochem Cy* 17: 1074–1097.
- 518 19. Van Oost K, et al. (2005) Landscape-scale modeling of carbon cycling under the  
519 impact of soil redistribution: The role of tillage erosion. *Global Biogeochem Cy*  
520 19: GB4014.
- 521 20. Van Oost K, et al. (2012) Legacy of human-induced erosion and burial on  
522 soil-atmosphere C exchange. *Proc Natl Acad Sci* 109(47): 19492–19497.
- 523 21. Wang Z, et al. (2014) The fate of buried organic carbon in colluvial soils: a  
524 long-term perspective. *Biogeosciences* 11(3): 873–883.
- 525 22. Jacinthe PA, Lal R, Kimble JM (2001) Organic carbon storage and dynamics in

- 526 croplands and terrestrial deposits as influenced by subsurface tile drainage. *Soil*  
527 *Sci* 166(5): 322–335.
- 528 23. Guenet B, et al. (2014) Fast mineralization of land-born C in inland waters: first  
529 experimental evidences of aquatic priming effect. *Hydrobiologia* 721: 35–44.
- 530 24. Van Hemelryck H, Govers G, Van Oost K, Merckx R (2010) The effect of soil  
531 redistribution on soil organic carbon: an experimental study. *Biogeosciences*  
532 7(12): 3971–3986.
- 533 25. Ministry of Water Resources, PRC, China Water & Power Press, Beijing (1997)  
534 *Criterion of Classification of Soil Erosion*. (in Chinese)
- 535 26. Liu BY, Zhang KL, Xie Y (2001) An empirical soil loss equation. *Proceedings of*  
536 *12th ISCO* (Tsinghua Univ. Press, Beijing), pp. 143–149.
- 537 27. Du HQ, Xue X, Wang T (2015) Mapping the risk of water erosion in the  
538 watershed of the Ningxia-Inner Mongolia Reach of the Yellow River, China. *J Mt*  
539 *Sci-Engl* 12(1): 70–84.
- 540 28. Miao CY, Ni JR, Borthwick AGL, Yang L (2011) A preliminary estimate of  
541 human and natural contributions to the changes in water discharge and sediment  
542 load in the Yellow River. *Global Planet Change* 76(3–4): 196–205.
- 543 29. Ministry of Water Resources, PRC, National Bureau of Statistics, PRC, (2013)  
544 *Bulletin of First National Census for Water* (China Water & Power Press, Beijing).  
545 (in Chinese)
- 546 30. Shang Guan W, Dai YJ, Liu BY, Ye AZ, Yuan H (2012) A soil particle-size  
547 distribution dataset for regional land and climate modelling in China. *Geoderma*

- 548 171–172: 85–91.
- 549 31. Oleson KW, et al. (2010) *Technical description of version 4.0 of the Community*  
550 *Land Model (CLM)*. (NCAR Technical Note, National Center for Atmospheric  
551 Research, Boulder, Colorado, USA).
- 552 32. Lawrence DM, et al. (2001) Parameterization improvements and functional and  
553 structural advances in Version 4 of the Community Land Model. *J Adv Model*  
554 *Earth Syst* 3: M03001.
- 555 33. Levy PE, Cannell MGR, Friend AD (2004) Modelling the impact of future  
556 changes in climate, CO<sub>2</sub> concentration and land use on natural ecosystems and the  
557 terrestrial carbon sink. *Global Environ Chang* 14: 21–30.
- 558 34. Sitch S, et al. (2003) Evaluation of ecosystem dynamics, plant geography and  
559 terrestrial carbon cycling in the LPJ dynamic global vegetation model. *Global*  
560 *Change Biol* 9: 161–185.
- 561 35. Smith B, Prentice IC, Sykes MT (2001) Representation of vegetation dynamics in  
562 the modelling of terrestrial ecosystems: comparing two contrasting approaches  
563 within European climate space. *Global Ecol Biogeogr* 10: 621–637.
- 564 36. Krinner G, et al. (2005) A dynamic global vegetation model for studies of the  
565 coupled atmosphere-biosphere system. *Global Biogeochem Cy* 19: GB1015.
- 566 37. Woodward FI, Smith TM, Emanuel WR (1995) A global land primary  
567 productivity and phytogeography model. *Global Biogeochem Cy* 9: 471–490.
- 568 38. Woodward FI, Lomas MR (2004) Simulating vegetation processes along the  
569 Kalahari transect. *Global Change Biol* 10: 383–392.

- 570 39. Cox PM (2001) *Description of the “TRIFFID” dynamic global vegetation model.*  
571 (Technical Note 24, Hadley Centre, Met Office, Bracknell, Berks U.K.).
- 572 40. Zeng N, Qian H, Roedenbeck C, Heimann M (2005) Impact of 1998–2002  
573 midlatitude drought and warming on terrestrial ecosystem and the global carbon  
574 cycle. *Geophys Res Lett* 32: L22709.
- 575 41. Zaehle S, Friend AD (2010) Carbon and nitrogen cycle dynamics in the O-CN  
576 land surface model: 1. Model description, site-scale evaluation, and sensitivity to  
577 parameter estimates. *Global Biogeochem Cy* 24: GB1005.
- 578 42. Wang Z, Doetterl S, Vanclooster M, Van Wesemael B, Van Oost K (2015)  
579 Constraining a coupled erosion and soil organic carbon model using  
580 hillslope-scale patterns of carbon stocks and pool composition. *J Geophys Res*  
581 *Biogeosci* 120: 452–465.
- 582 43. Nadeu E, Gobin A, Fiener P, Van Wesemael B, Van Oost K (2015) Modelling the  
583 impact of agricultural management on soil carbon stocks at the regional scale: the  
584 role of lateral fluxes. *Global Change Biol* 21(8): 3181–3192.
- 585 44. Lugato E, Paustian K, Panagos P, Jones A, Borrelli P (2016) Quantifying the  
586 erosion effect on current carbon budget of European agricultural soils at high  
587 spatial resolution Erosion integration in the European C balance. *Global Change*  
588 *Biol.* DOI: 10.1111/gcb.13198. First published: 23 February 2016.
- 589 45. Li TK, Zhu B, Wang XG, Kou CL (2013) Characteristics of dissolved organic  
590 carbon leaching from hillslope cropland of purple soil in the Sichuan Basin,  
591 China. *J Food Agric Environ* 11(2):1522–1527.

- 592 46. Long GQ, Jiang YJ, Sun B (2015) Seasonal and inter-annual variation of leaching  
593 of dissolved organic carbon and nitrogen under long-term manure application in  
594 an acidic clay soil in subtropical China. *Soil Tillage Res* 146: 270–278.
- 595 47. Gou XL, et al. (2013) Effect of Changes in Seasonal Freeze-thaw Pattern on DOC  
596 Loss from Leaching in the Alpine Forest Soil. *Journal of Soil and Water  
597 Conservation* 27(6): 205–210. (in Chinese)
- 598 48. Li Y, et al. (2015) Sustained high magnitude erosional forcing generates an  
599 organic carbon sink: test and implications in the Loess Plateau, China. *Earth  
600 Planet Sci Lett* 411: 281–289.
- 601 49. Wang X, Ma H, Li R, Song Z, Wu J (2012) Seasonal fluxes and source variation  
602 of organic carbon transported by two major Chinese Rivers: The Yellow River  
603 and Changjiang (Yangtze) River. *Global Biogeochem Cy* 26(2): GB2025.
- 604 50. Wang L, Song C, Guo Y (2015) The spatiotemporal distribution of dissolved  
605 carbon in the main stems and their tributaries along the lower reaches of  
606 Heilongjiang River Basin, Northeast China. *Environ Sci Pollut R*: 1–14.
- 607 51. Zhu X, Yu G, Gao Y, Wang Q (2012) Fluxes of particulate carbon from rivers to  
608 the ocean and their changing tendency in China. *Progress in Geography* 31(1):  
609 118–122. (in Chinese)
- 610 52. Ni H, Lu F, Luo X, Tian H, Zeng E (2008) Riverine inputs of total organic carbon  
611 and suspended particulate matter from the Pearl River Delta to the coastal ocean  
612 off South China. *Mar Pollut Bull* 56(6): 1150–1157.
- 613 53. Zhang LK, Qin XQ, Yang H, Huang QB, LiuPY (2013) Transported fluxes of the

- 614 riverine carbon and seasonal variation in pearl river basin. *Chinese Journal of*  
615 *Environmental Science* 34(8): 3025–3034. (in Chinese)
- 616 54. Xia B, Zhang L (2011) Carbon distribution and fluxes of 16 rivers discharging  
617 into the Bohai Sea in summer. *Acta Oceanol Sin* 30(3): 43–54.
- 618 55. Xu JX, Sun J (2004) Effect of erosion control measures on sediment delivery  
619 ratio. *Advances in Water Science* 15(1): 29–34. (in Chinese)
- 620 56. Gong SZ, Xiong SG (1979) Sources and regional distribution of sediments in the  
621 Yellow River. *Yellow River* 1(1): 7–17.
- 622 57. Cai QG, Chen H, Ma SJ (1991) Sediment Delivery Ratio of a single storm in the  
623 Yangdaogou watershed in the hilly loess region. *Proceedings of Environmental*  
624 *Evolution and the Regularities of Water and Sediment Movement in the Yellow*  
625 *River Basin* (Geology Press, Beijing). (in Chinese)
- 626 58. Jing K (1999) Studies on the sediment delivery in the Jinghe and Beiluohe Basins.  
627 *Yellow River* 21(12):18–19. (in Chinese)
- 628 59. Mu JZ, Meng QM (1982) Sediment Delivery Ratio in the calculation of sediment  
629 yield in river basins. *Journal of Sediment Research* 2: 60–65. (in Chinese)
- 630 60. Cao H, et al. (2001) Primary estimate on soil loss amounts in Yangtse Delta  
631 Region using  $^{137}\text{Cs}$  technique. *Journal of Soil and Water Conservation* 15(1):  
632 13–15. (in Chinese)
- 633 61. Yu JR, Shi LR, Feng MH, Li RH (1991) The surface erosion and fluvial silt in the  
634 upper reaches of Changjiang river. *Bulletin of Soil and Water Conservation* 11(1):  
635 9–17. (in Chinese)

- 636 62. Zhang FZ (1993) On Sediment Delivery Ratio. *Science of Soil and Water*  
637 *Conservation* 10: 17–18. (in Chinese)
- 638 63. Wei ZG (2004) Second stage of the key conservation project to the upper  
639 Yongding River Basin, Datong City. *Science of Soil and Water Conservation*  
640 Suppl. Issue: 26–27. (in Chinese)
- 641 64. Wu CJ, Gan ZM (1998) The problem about the river silt delivery ratio in South  
642 Shaanxi. *Scientia Geographica Sinica* 18(1): 39–44.
- 643 65. Ma K, Wang ZQ, Chen X, Sui GP, Yang SP (2003) Study of erosion on the  
644 neutron activate analysis of the fixed soil core eu tracer on red soil slope. *Journal*  
645 *of Zhejiang University* 29(4): 361–367. (in Chinese)
- 646 66. Liu Y, Zhang P (1995) Surface erosion in upper Yangtze Region and river  
647 sediment transport. *Journal of Yangtze River Scientific Research Institute* 12(1):  
648 40–44. (in Chinese)
- 649 67. Li ZG, Liu BZ (2006) Calculation on soil erosion amount of main river basin in  
650 China. *Science of Soil and Water Conservation* 4(2): 1–6. (in Chinese)
- 651 68. Fan JR, Zhong XH, Liu SZ (2003) Remote-sensing-based monitoring on soil  
652 erosion and sediment delivery in typical watersheds in the middle and lower  
653 regions of the Jianglingjiang River Basin. *Science in China Series E* 33(S1):  
654 157–163. (in Chinese)
- 655 69. Zeng QM, et al. (1996) Remote sensing investigation and analysis of water and  
656 soil loss in the upper reaches of Miyun Reservoir. *Journal of Soil and Water*  
657 *Conservation* 2(1): 46–49. (in Chinese)



- 658 70. Lu J (1989) Preliminary study on variation of erosion and sediment yield of  
659 drainage basins in Yanshan, north China, associated with geology and  
660 geomorphology. *Journal of Sediment Research* 1: 25–83. (in Chinese)
- 661 71. Niu XY (2015) Soil Erosion and Nutrient Variability Under LUCC in the Small  
662 Catchment of Dianchi. (Doctoral dissertation, Nanjing Normal University). (in  
663 Chinese)
- 664 72. Chen DL (2004) Studies on the Effects and Mechanism of Soil and Water  
665 Conservation under Different Forest Restoration Types in Sloping Field of Red  
666 Soil Region. (Doctoral dissertation, Hunan Agricultural University). (in Chinese)
- 667 73. Deng RF, Wang BQ, Liu PL, Liu D, Jia XU (2011) Effects of different land use  
668 patterns on soil organic carbon loss on the loess slope. *Research of Soil and Water  
669 Conservation* 15(5): 104–107. (in Chinese)
- 670 74. Jia SW (2010) Soil Organic Carbon Loss through Water Erosion in Loess Hilly  
671 Region of Northwestern China. *4<sup>th</sup> International Conference on Management and  
672 Service Science, IEEE* (Wuhan, China), pp. 1–4.
- 673 75. Wang BQ (2004) The Dynamics and Transfer of Soil Organic Carbon and  
674 Nitrogen in the Scenario of Erosion and Aridity in the Loessial Region. (Doctoral  
675 dissertation, Northwest A&F University). (in Chinese)
- 676 76. Ma W, et al. (2014) Effect of soil erosion on dissolved organic carbon  
677 redistribution in subtropical red soil under rainfall simulation. *Geomorphology*  
678 226(226): 217–225.
- 679 77. Jiang QL, Xie YS, Zhang YL, Zhang H, Hao XD (2011) Soil erosion in a small

- 680 watershed in water source areas of Beijing and Tianjin: Spatial simulation.  
681 *Chinese Journal of Ecology* 30(8): 1703–1711. (in Chinese)
- 682 78. Qin W, Zuo CQ, Zheng HJ, Ma L, Du PF (2013) Determination of key factors of  
683 soil loss equation of red-soil sloping land in northern Jiangxi Province.  
684 *Transactions of the Chinese Society of Agricultural Engineering* 29(21): 115–125.  
685 (in Chinese)
- 686 79. Jiao J (2010) Study on Spatial Variation of Soil Erosion in Northeastern China.  
687 *Research of Soil and Water Conservation* 17(3): 1–6. (in Chinese)
- 688 80. Ju ZS et al. (2015) Evaluation of soil erosion in small watershed of the Three  
689 Gorges Reservoir Region by Using  $^{137}\text{Cs}$ ,  $^{210}\text{Pb}$  and CSLE. *Journal of Soil and*  
690 *Water Conservation* 29(3): 75–80. (in Chinese)
- 691 81. Yang SY (2014) The analysis of soil erosion pattern in National key harnessing  
692 areas of Yimeng Mountains based on CSLE models. (Doctoral dissertation,  
693 Shandong Agricultural University). (in Chinese)
- 694
- 695

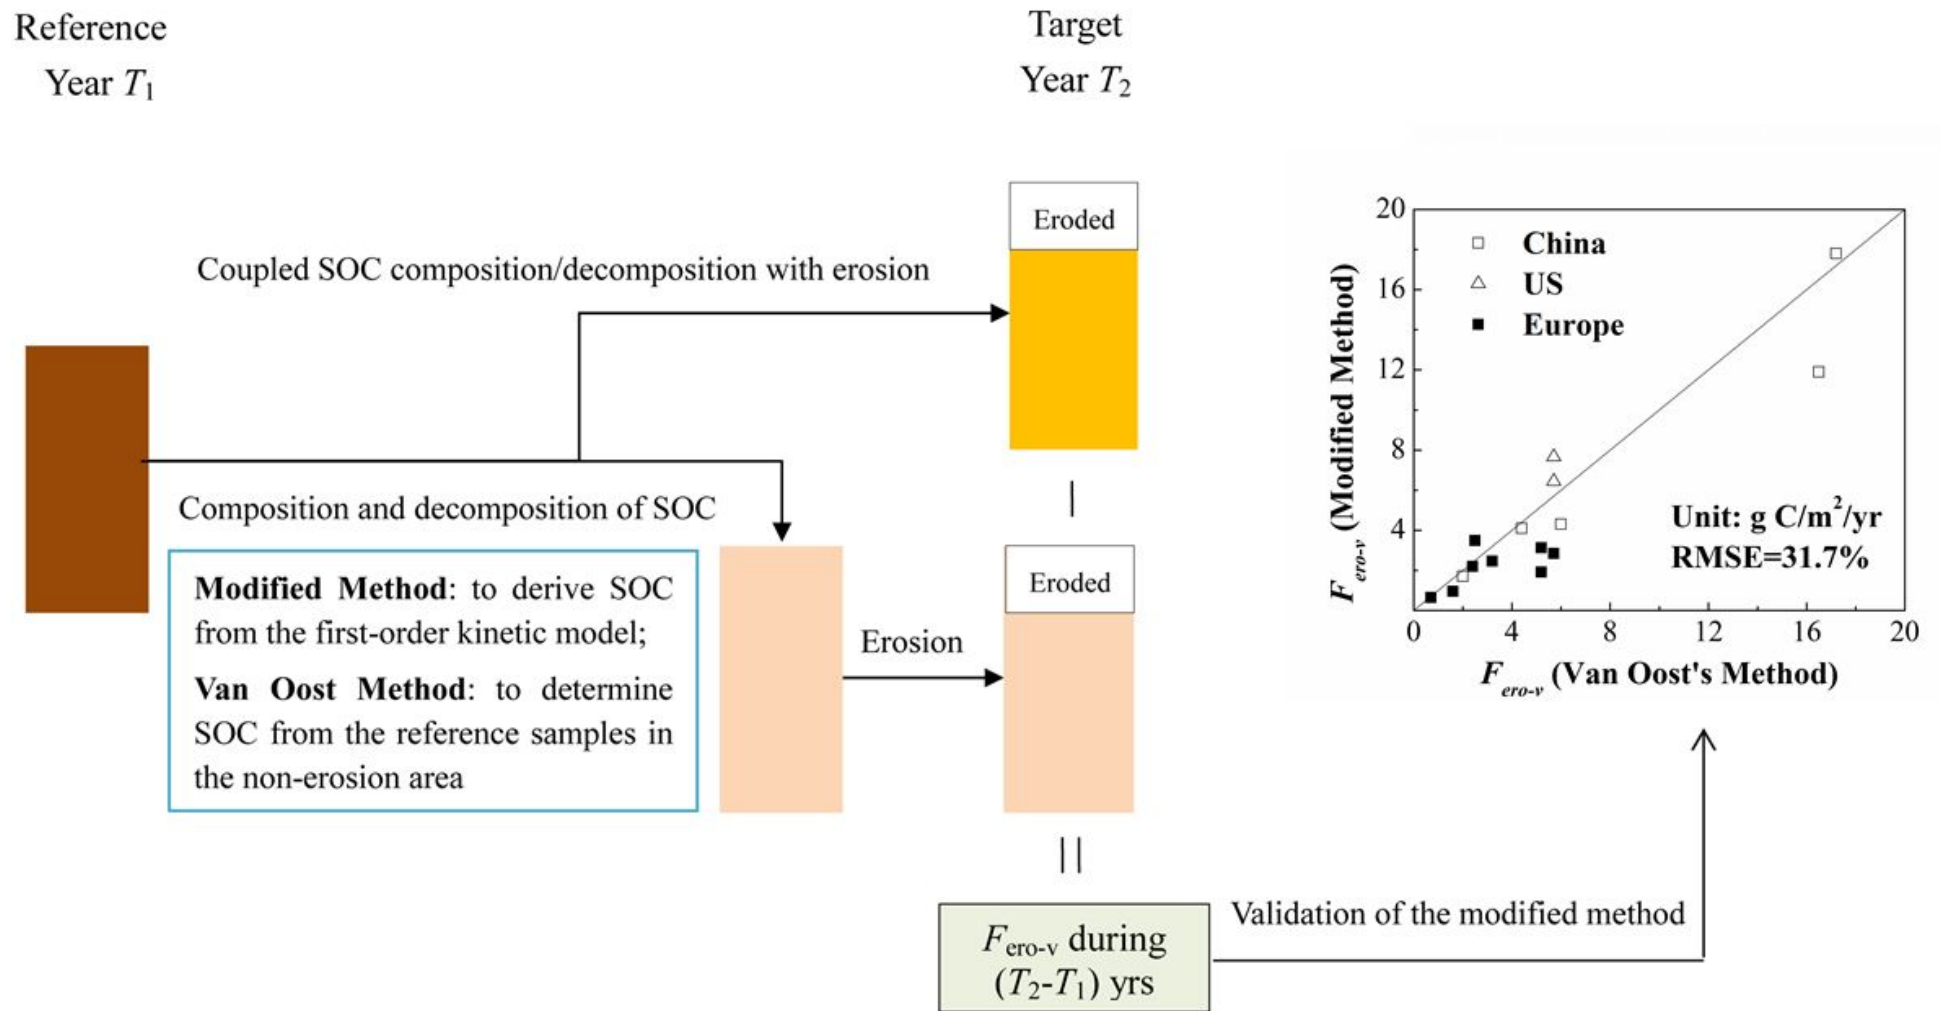

**Fig. S1.** Comparison between Van Oost et al.'s (2) and modified methods based on data from small watersheds in China and Europe.

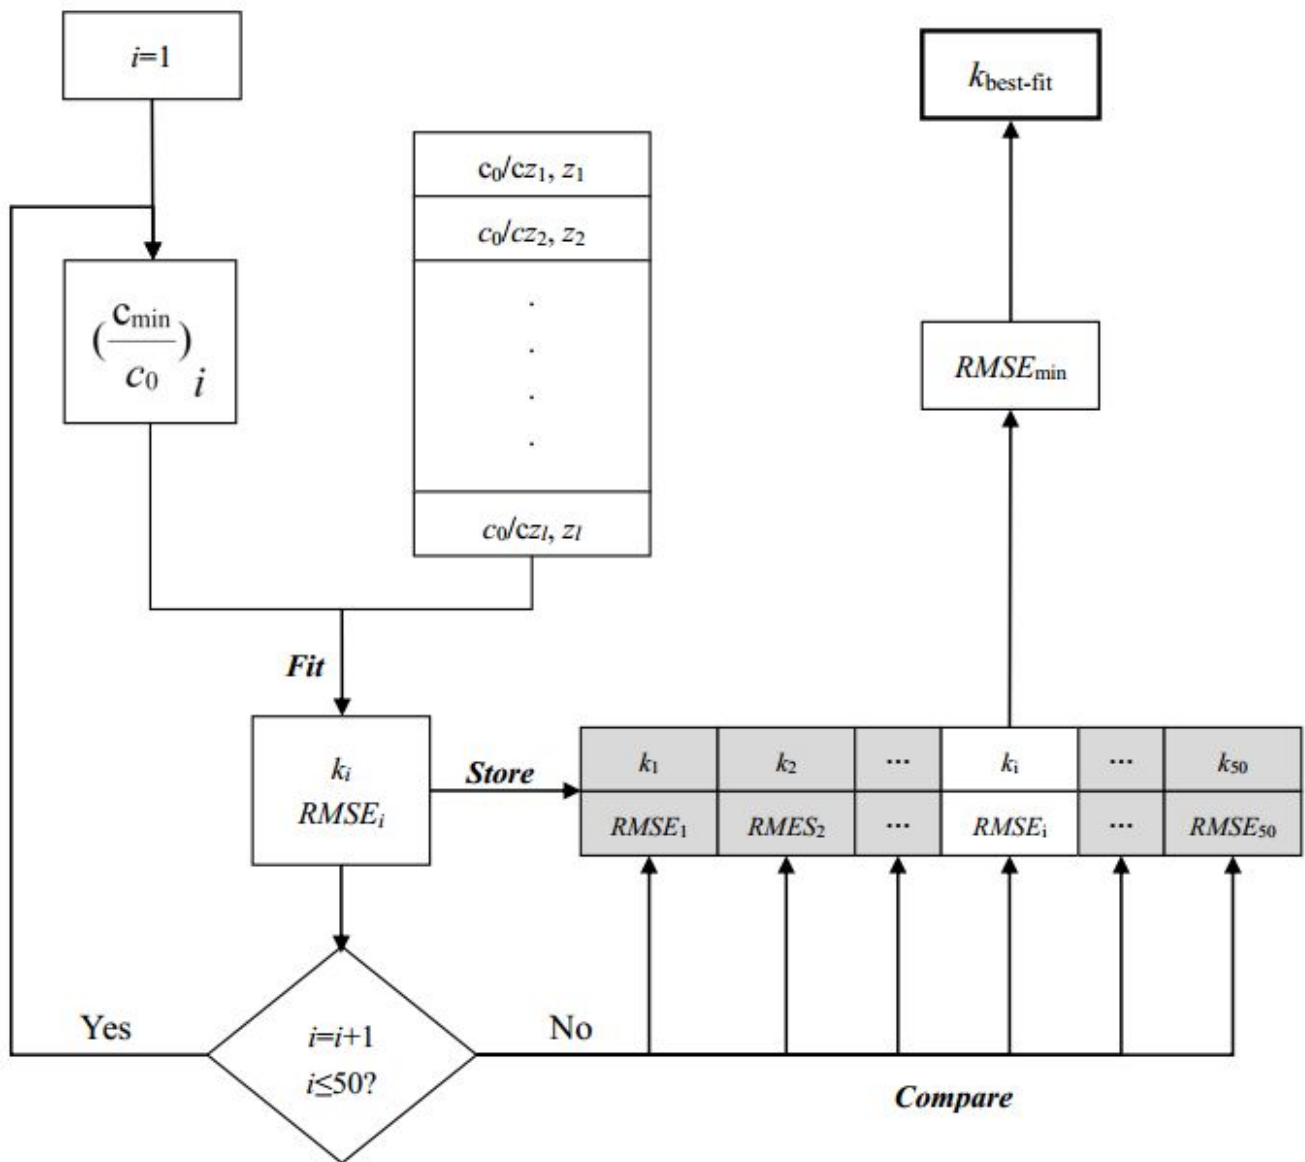

**Fig. S2.** Flow chart showing how the initial SOC profile is determined.

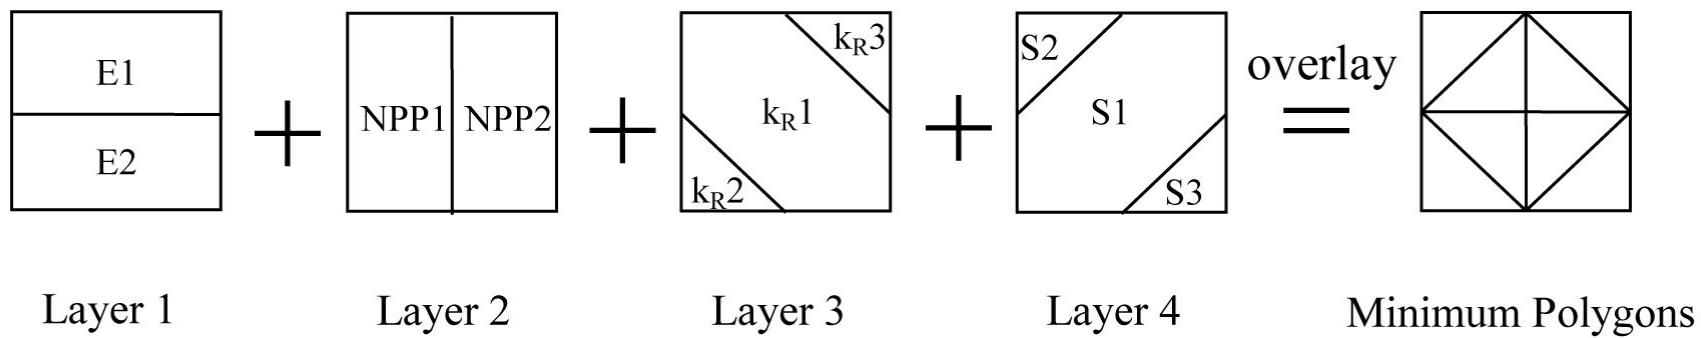

**Fig. S3.** Generation of the minimum polygon.

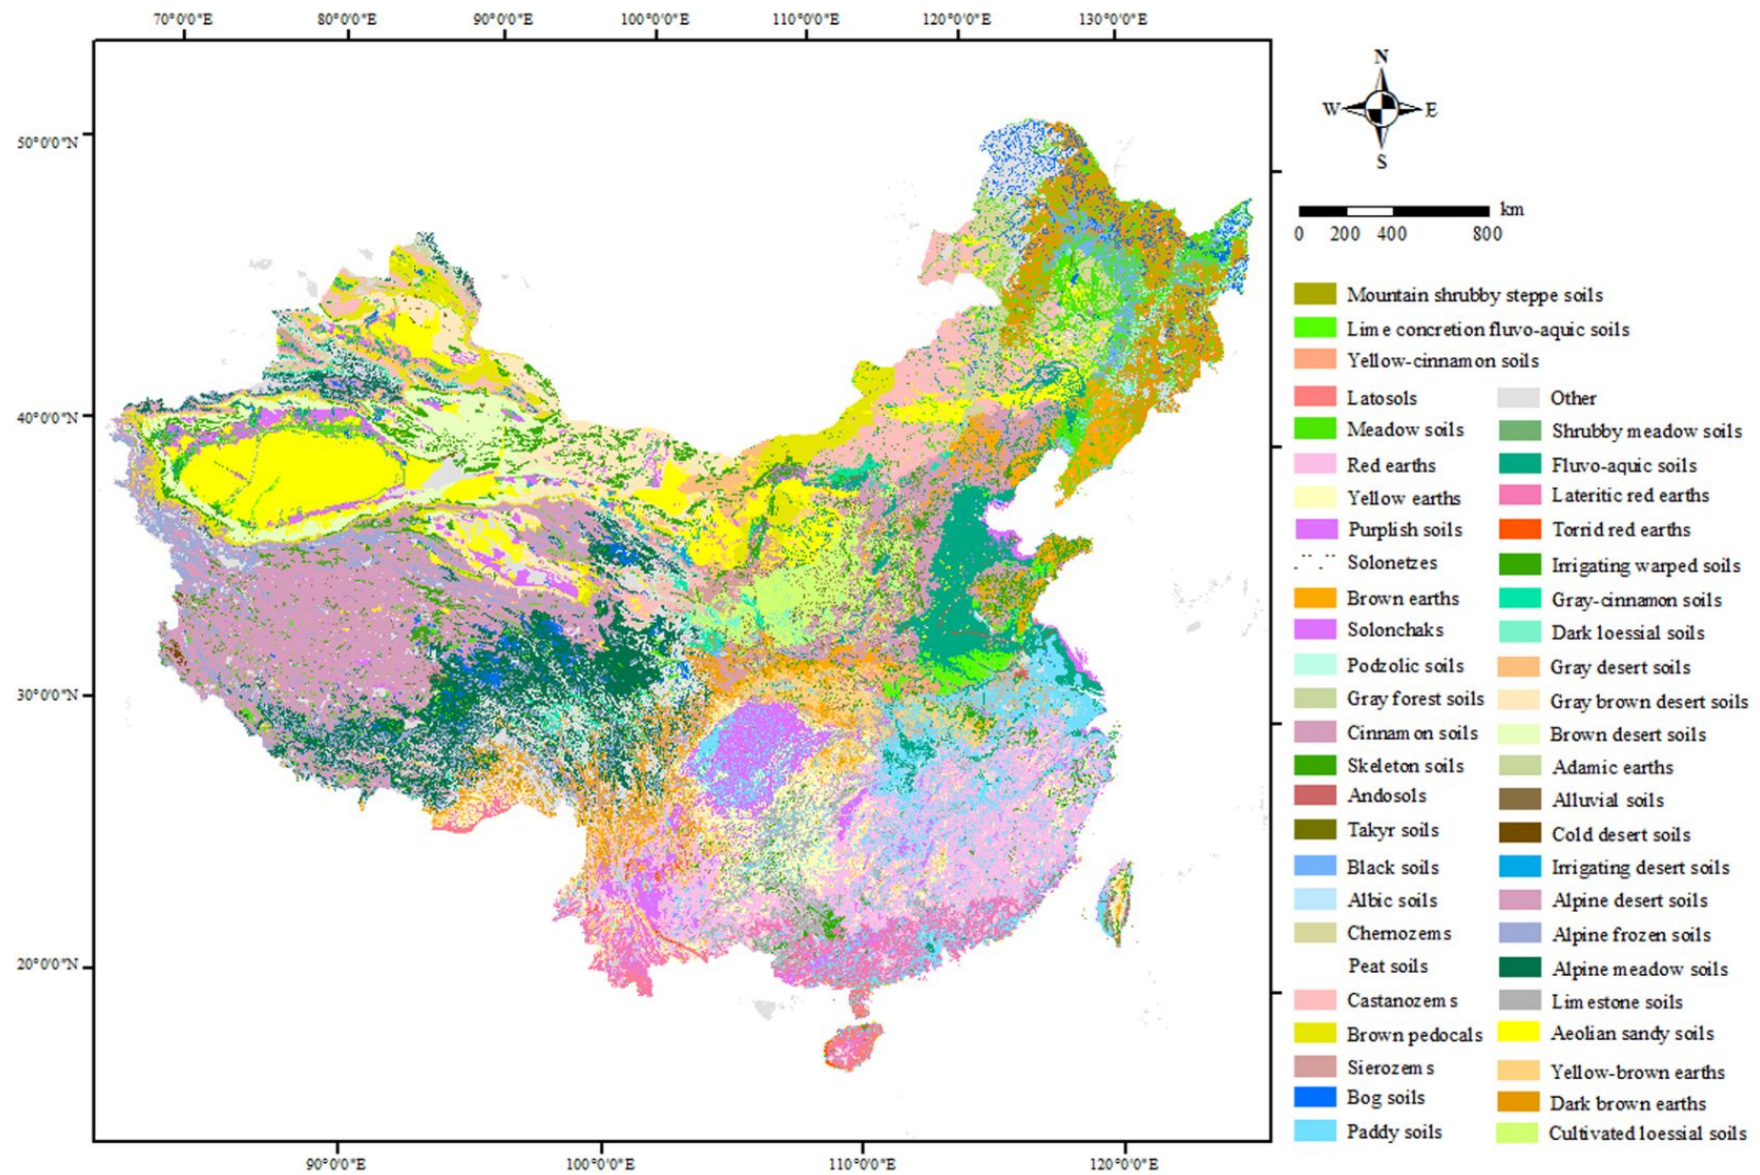

**Fig. S4.** Spatial distribution of different soil types in China, produced using ArcGIS 10.0 software.

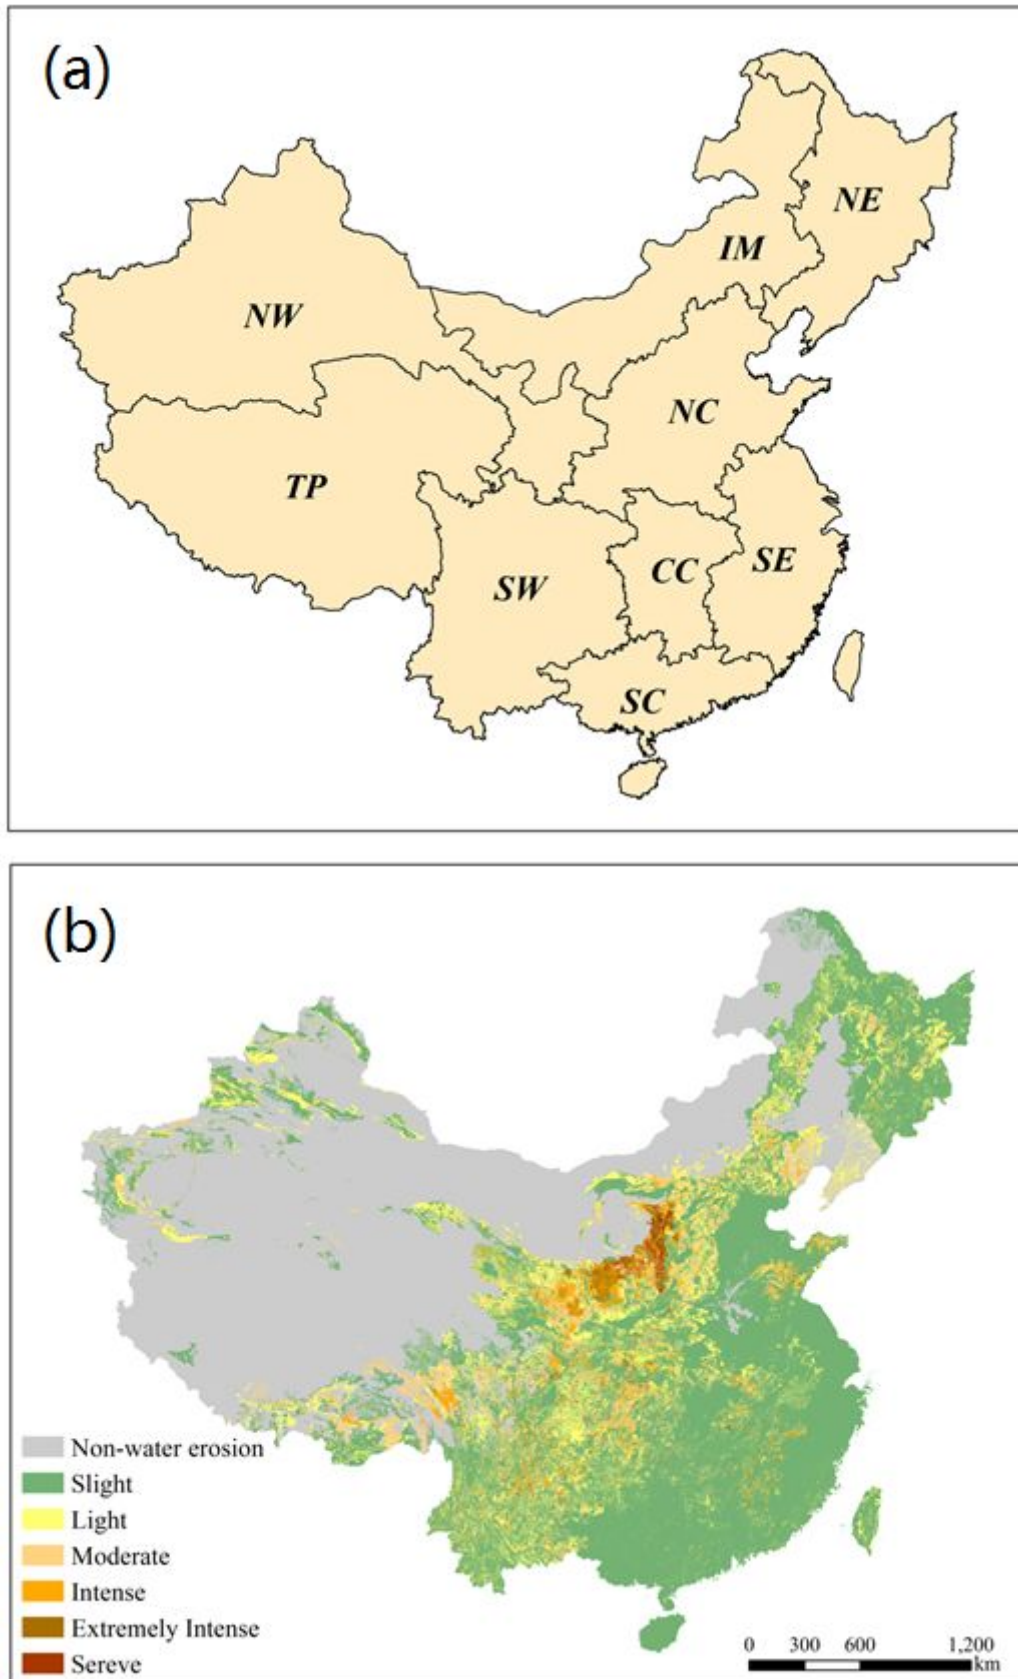

**Fig. S5.** (a) Nine sub-regions in China and (b) Zonation map for water erosion grades in China based on data from National Survey of Soil Erosion in 1995–1996 (CC: Central China; IM: Inner Mongolia; NC: North China; NE: Northeast China; NW: Northwest China; SC: South China; SE: Southeast China; SW: Southwest China; TP: Tibet Plateau)



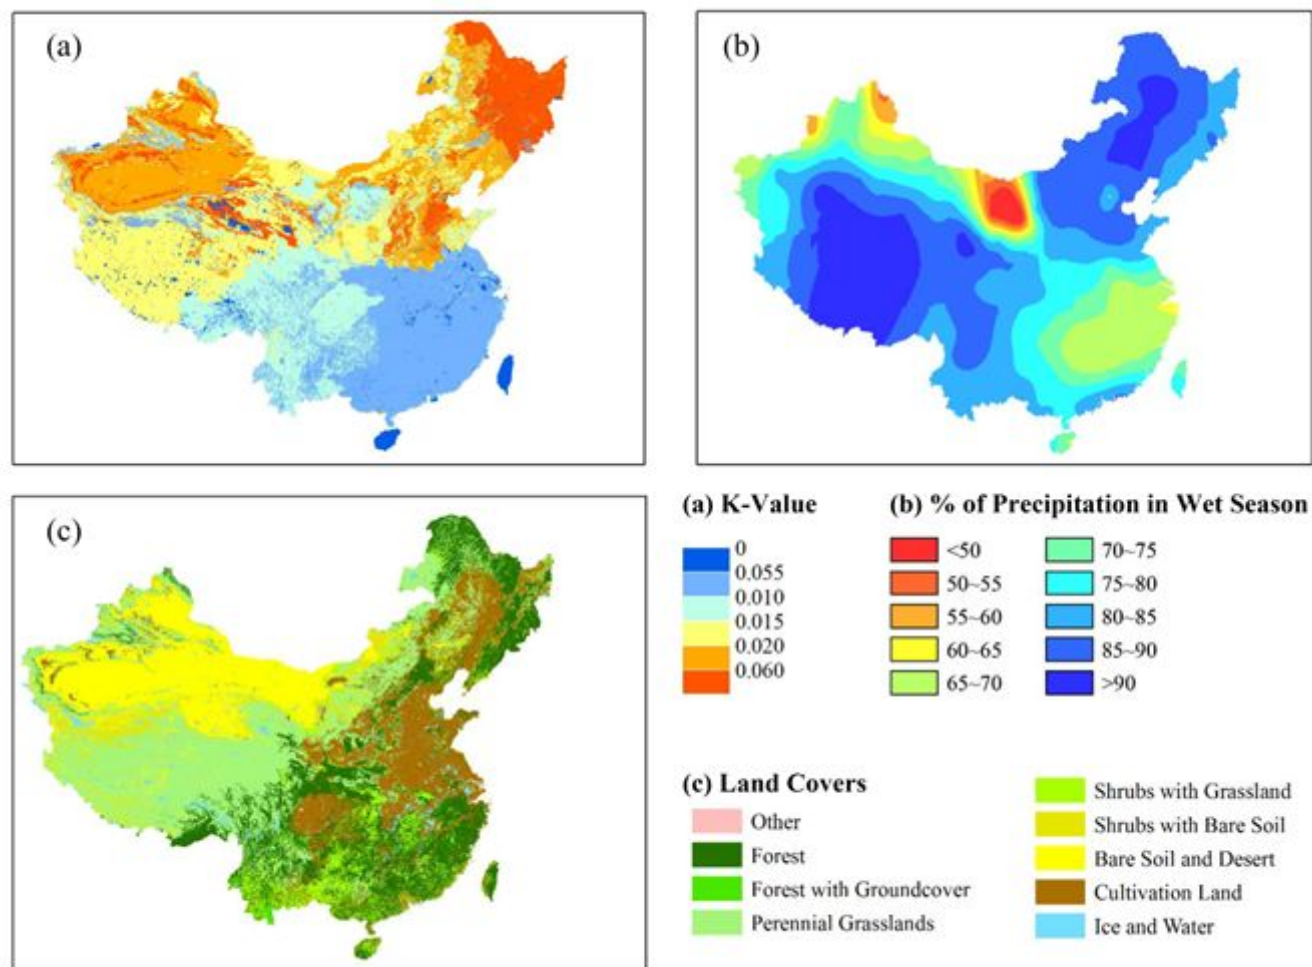

**Fig. S6.** Distribution of (a) K-value as an indicator of soil erodibility; (b) percentage of precipitation in wet season in China (from April to September); and (c) agricultural land.



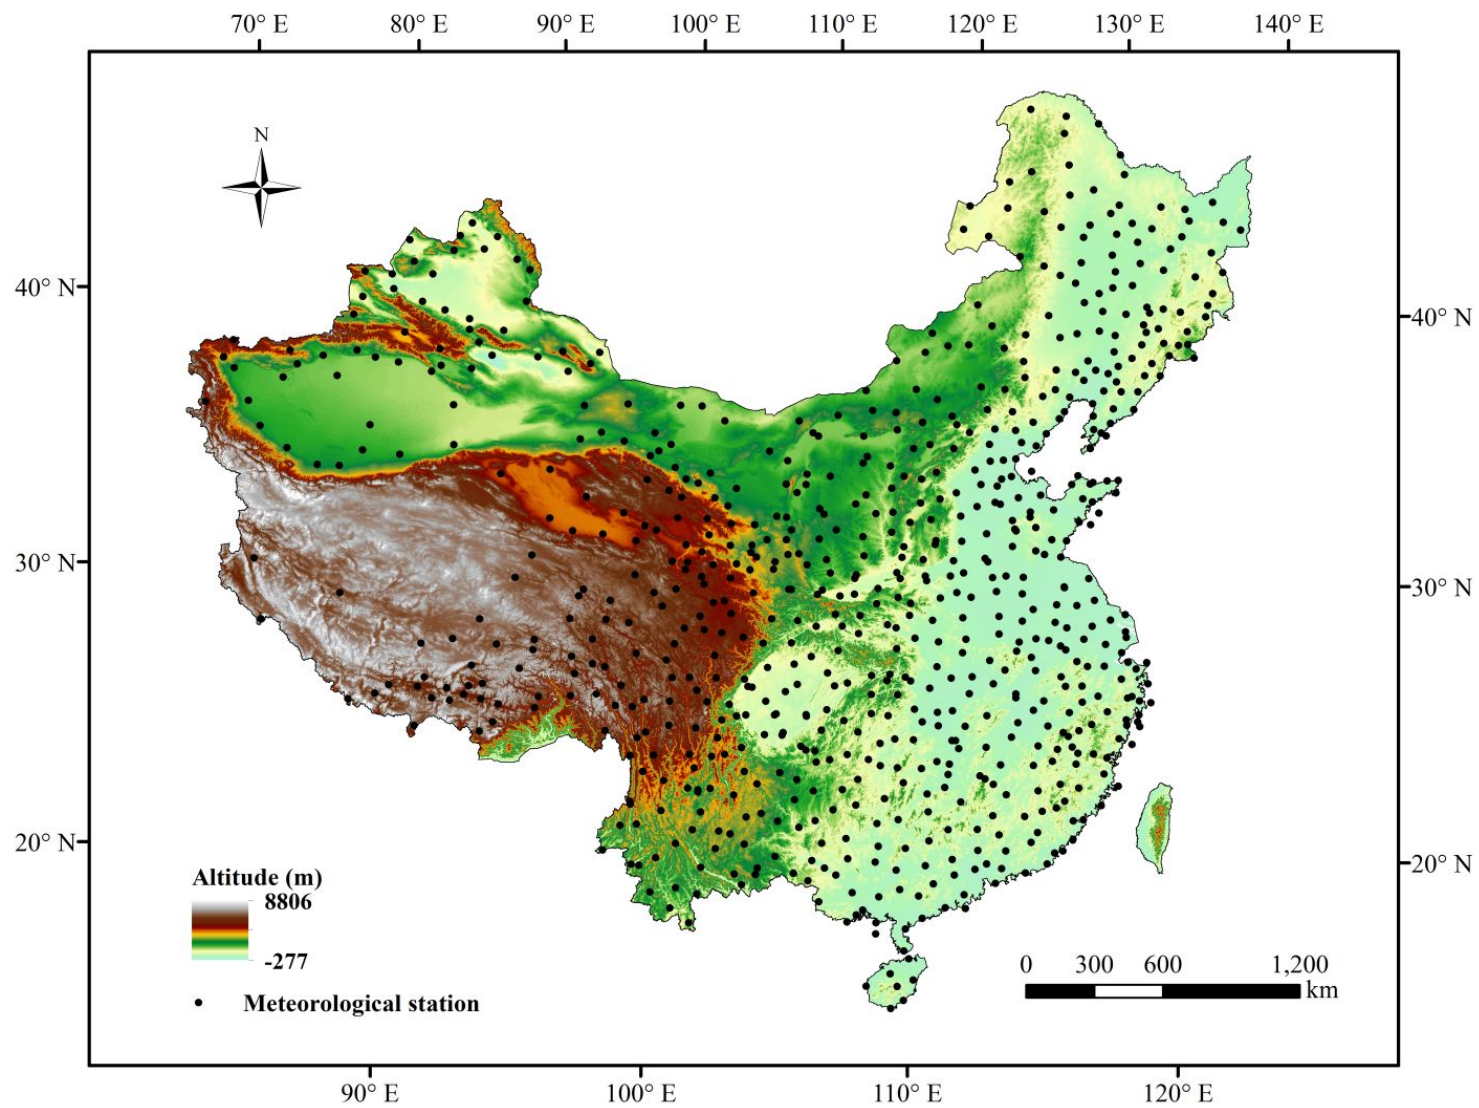

**Fig. S7.** Locations of the 675 Meteorology Stations in China.

**Table S1. Regional distribution of the five flux components for each sub-region**

| Region  | Total Area<br>M km <sup>2</sup> | Erosional Area<br>10 <sup>6</sup> km <sup>2</sup> |                | F1<br>Mt C/yr     |                  | F2<br>Mt C/yr    |                 | F3<br>Mt C/yr   |                 | F4<br>Mt C/yr  |                | F5<br>Mt C/yr  |                | F1-F2<br>Mt C/yr |                 | F3 – (F4+F5)<br>Mt C/yr |                 |
|---------|---------------------------------|---------------------------------------------------|----------------|-------------------|------------------|------------------|-----------------|-----------------|-----------------|----------------|----------------|----------------|----------------|------------------|-----------------|-------------------------|-----------------|
|         |                                 | 1 <sup>a</sup>                                    | 2 <sup>b</sup> | 1 <sup>a</sup>    | 2 <sup>b</sup>   | 1 <sup>a</sup>   | 2 <sup>b</sup>  | 1 <sup>a</sup>  | 2 <sup>b</sup>  | 1 <sup>a</sup> | 2 <sup>b</sup> | 1 <sup>a</sup> | 2 <sup>b</sup> | 1 <sup>a</sup>   | 2 <sup>b</sup>  | 1 <sup>a</sup>          | 2 <sup>b</sup>  |
|         |                                 | CC                                                | 9.50           | 0.08              | 0.07             | 9.70<br>±4.30    | 6.00<br>±2.70   | 5.80<br>±3.40   | 4.20<br>±2.50   | 3.84<br>±1.26  | 2.85<br>±1.38  | 0.12<br>±0.07  | 0.08<br>±0.04  | 0.14<br>±0.08    | 0.07<br>±0.04   | 3.90<br>±2.30           | 1.90<br>±1.10   |
| IM      | 1.14                            | 0.15                                              | 0.10           | 12.80<br>±5.70    | 5.40<br>±2.40    | 7.70<br>±4.60    | 4.20<br>±2.50   | 1.90<br>±1.28   | 1.03<br>±0.61   | 0.04<br>±0.02  | 0.04<br>±0.02  | 0.03<br>±0.02  | 0.03<br>±0.02  | 5.10<br>±3.0     | 1.20<br>±0.70   | 1.83<br>±1.32           | 0.96<br>±0.65   |
| NC      | 0.90                            | 0.30                                              | 0.21           | 25.50<br>±11.30   | 12.50<br>±5.60   | 8.70<br>±5.20    | 7.40<br>±4.40   | 12.80<br>±9.03  | 6.10<br>±4.25   | 0.07<br>±0.04  | 0.05<br>±0.03  | 0.11<br>±0.07  | 0.05<br>±0.03  | 16.80<br>±9.90   | 5.10<br>±3.00   | 12.62<br>±9.14          | 6.00<br>±4.31   |
| NE      | 0.79                            | 0.15                                              | 0.15           | 19.90<br>±8.80    | 21.50<br>±9.60   | 14.00<br>±8.30   | 13.40<br>±7.90  | 3.59<br>±1.89   | 6.10<br>±2.94   | 0.12<br>±0.07  | 0.11<br>±0.06  | 0.11<br>±0.06  | 0.12<br>±0.07  | 5.90<br>±3.50    | 8.10<br>±4.80   | 3.37<br>±2.02           | 5.87<br>±3.07   |
| NW      | 2.10                            | 0.28                                              | 0.17           | 26.70<br>±11.90   | 13.80<br>±6.20   | 12.80<br>±7.60   | 9.10<br>±5.40   | 3.91<br>±3.58   | 1.39<br>±1.36   | 0.02<br>±0.01  | 0.02<br>±0.01  | 0.03<br>±0.02  | 0.01<br>±0.01  | 13.90<br>±8.20   | 4.70<br>±2.80   | 3.86<br>±3.61           | 1.36<br>±1.38   |
| SC      | 0.45                            | 0.01                                              | 0.08           | 0.70<br>±0.30     | 6.00<br>±2.70    | 0.60<br>±0.30    | 4.70<br>±2.80   | 1.20<br>±1.14   | 2.20<br>±1.73   | 0.10<br>±0.05  | 0.10<br>±0.06  | 0.09<br>±0.05  | 0.11<br>±0.07  | 0.20<br>±0.10    | 1.30<br>±0.80   | 1.02<br>±1.25           | 1.98<br>±1.86   |
| SE      | 0.68                            | 0.07                                              | 0.07           | 6.40<br>±2.90     | 4.40<br>±2.00    | 4.60<br>±2.80    | 4.10<br>±2.40   | 4.69<br>±2.53   | 3.41<br>±1.85   | 0.17<br>±0.09  | 0.10<br>±0.06  | 0.25<br>±0.15  | 0.09<br>±0.05  | 1.80<br>±1.10    | 0.40<br>±0.20   | 4.27<br>±2.78           | 3.22<br>±1.95   |
| SW      | 1.13                            | 0.46                                              | 0.31           | 67.00<br>±29.80   | 40.50<br>±18.00  | 33.70<br>±20.00  | 18.40<br>±10.90 | 17.91<br>±5.02  | 17.30<br>±5.54  | 0.28<br>±0.15  | 0.23<br>±0.13  | 0.32<br>±0.19  | 0.26<br>±0.16  | 33.30<br>±19.70  | 22.10<br>±13.10 | 17.31<br>±5.37          | 16.81<br>±5.82  |
| TP      | 1.92                            | 0.11                                              | 0.10           | 57.50<br>±25.60   | 23.00<br>±10.20  | 24.60<br>±14.60  | 17.50<br>±10.40 | 2.21<br>±2.10   | 1.56<br>±1.52   | 0.10<br>±0.05  | 0.06<br>±0.04  | 0.12<br>±0.07  | 0.06<br>±0.03  | 32.90<br>±19.50  | 5.50<br>±3.20   | 2.00<br>±2.23           | 1.44<br>±1.59   |
| SUM     | 9.50                            | 1.61                                              | 1.26           | 226.30<br>±100.70 | 133.20<br>±59.30 | 112.50<br>±66.80 | 82.90<br>±49.20 | 52.05<br>±27.84 | 41.94<br>±21.17 | 1.00<br>±0.56  | 0.80<br>±0.44  | 1.20<br>±0.72  | 0.80<br>±0.48  | 113.80<br>±67.30 | 50.30<br>±29.80 | 49.85<br>±29.11         | 40.34<br>±22.09 |
| Average |                                 | 1.44                                              |                | 179.80±80.00      |                  | 97.70±58.00      |                 | 47.00±24.50     |                 | 0.90±0.50      |                | 1.00±0.60      |                | 82.00±48.60      |                 | 45.10±25.60             |                 |

a: based on the erosion data from the 2<sup>nd</sup> National Survey in 1995–1996

b: based on the erosion data from the 4<sup>th</sup> National Survey in 2010–2012.

**Table S2. POC and DOC fluxes of seven major rivers in China**

| Basin         | Drainage Area<br>(km <sup>2</sup> ) | Sediment Delivery<br>Mt/yr | POC Flux<br>(Tg/yr) | DOC Flux<br>(Tg/yr) | Observation<br>Year(s) | Reference |
|---------------|-------------------------------------|----------------------------|---------------------|---------------------|------------------------|-----------|
| Yangtze River | 1,705,383                           | 407.9                      | 1.520               | 1.580               | 2009                   | (49)      |
| Yellow River  | 752,032                             | 766.6                      | 0.389               | 0.032               | 2009                   | (49)      |
| Helongjiang   | -                                   | -                          | -                   | 1.570               | 2009–2010              | (50)      |
| Songhua Jiang | 528,300                             | 407.9                      | 0.266               | -                   | 2003–2009              | (51)      |
| Pearl Delta   | -                                   | -                          | 0.500               | 0.400               | 2005–2006              | (52)      |
| Pearl River   | 415,200                             | 766.6                      | 2.500               | 1.130               | 2012                   | (53)      |
| Liao River    | 120,764                             | 11.1                       | 0.048               | 0.022               | 2005                   | (54)      |
| Hai River     | 95,971                              | 8.0                        | 0.038               | 0.038               | 2005                   | (54)      |
| Huai River    | 131,600                             | 10.5                       | 0.150               | -                   | 2003–2009              | (51)      |

**Table S3.** Conversion from erosion grade to erosion rate, with corresponding *SDR* range (1, 25).

| Erosion Grade            | Erosion Modulus<br>( $t \cdot km^{-2} \cdot a^{-1}$ ) | Erosion Rate<br>( $mm \cdot a^{-1}$ ) | <i>SDR</i> Grade |
|--------------------------|-------------------------------------------------------|---------------------------------------|------------------|
| 1<br>(Slight)            | < 200, 500, 1000                                      | < 0.15, 0.37, 0.74                    | -                |
| 2<br>(Light)             | 200, 500, 1000–2500                                   | 0.15, 0.37, 0.74–1.90                 | 0.1–0.3          |
| 3<br>(Moderate)          | 2500–5000                                             | 1.90–3.70                             | 0.3–0.5          |
| 4<br>(Intense)           | 5000–8000                                             | 3.70–5.90                             | 0.5–0.7          |
| 5<br>(Extremely Intense) | 8000–15000                                            | 5.90–11.10                            | 0.7–0.9          |
| 6<br>(Severe)            | > 15000                                               | > 11.10                               | 0.9–1.0          |

**Table S4.** Summary of values of available *SDR* in representative areas throughout China

| Site                | Region      | Erosion Grade | <i>SDR</i> | Reference |
|---------------------|-------------|---------------|------------|-----------|
| Wuding Basin        | North China | VI            | 1.00       | (55)      |
| Loess Plateau       | North China | VI            | 1.00       | (56)      |
| Yangdaogou          | North China | VI            | 1.00       | (57)      |
| Liujiia Basin       | North China | VI            | 0.91       | (58)      |
| Dali Basin          | North China | V             | 0.80–1.31  | (59)      |
| Middle Yellow River | North China | IV            | 0.70–1.00  | (60)      |
| West Han Basin      | South China | IV            | 0.66       | (61)      |
| Pearl Basin         | South China | III           | 0.36–0.41  | (62)      |
| Han Basin           | South China | II            | 0.27–0.55  | (62)      |
| Yongding Basin      | North China | II            | 0.26       | (63)      |
| Hainan Province     | South China | II            | 0.26–0.62  | (62)      |
| Shannxi Province    | Northwest   | II            | 0.24–0.59  | (64)      |
| Lanxi Basin         | South China | II            | 0.20–0.35  | (65)      |
| Jiangling Basin     | Southwest   | II            | 0.14–0.61  | (66)      |
| Songhuajiang Basin  | Northeast   | II            | 0.12       | (67)      |
| Lizi Basin          | Southwest   | II            | 0.11–0.27  | (68)      |
| Chaobai Basin       | North China | II            | 0.10–0.26  | (69)      |
| Yan Mountain        | North China | II            | 0.15–0.69  | (70)      |

**Table S5.** Comparison of F1 and F2 components with data on SOC removal and deposition collected from small watersheds in different regions throughout China.

| Reference | Region | Location             | Published<br>SOC<br>removal | F1 in<br>this paper | Published<br>SOC<br>deposition | F2 in<br>this paper |
|-----------|--------|----------------------|-----------------------------|---------------------|--------------------------------|---------------------|
|           |        |                      | kg/km <sup>2</sup> /yr      |                     | kg/km <sup>2</sup> /yr         |                     |
| (71)      | SW     | 102°34'E,<br>25°6' N | 21,330                      | 11,112–45,2<br>21   | -                              | -                   |
| (72)      | CC     | 27°05'N,<br>112°18'E | 33,150                      | 20,244–46,0<br>58   | -                              | -                   |
| (73)      | NC     | 109°27'E,<br>36°26'N | 16,320                      | 10,271–24,0<br>80   | -                              | -                   |
| (74)      | NC     | 36°58'N,<br>109°11'E | 8,942                       | 6,629–14,51<br>3    | -                              | -                   |
| (13)      | NE     | 125°16'E,<br>48°42'N | 42,600                      | 12,811–67,5<br>33   | -                              | -                   |
| (75)      | NC     | 109°13'E,<br>36°42'N | -                           | -                   | 14,690                         | 9,690–22,71<br>7    |
| (13)      | NE     | 125°16'E,<br>48°42'N | -                           | -                   | 32,500                         | 8,585–58,76<br>2    |
| (76)      | NE     | 44.7°N,<br>125.9°E   | -                           | -                   | 18,994                         | 13,505–52,0<br>14   |

**Table S6.** Crop yields of 31 provinces in the 1990s and 2010s (i.e.: 2010–2015)\*

| Province     | 1990s                                 |                                   | 2010s                      |                                       |                                   |                            |
|--------------|---------------------------------------|-----------------------------------|----------------------------|---------------------------------------|-----------------------------------|----------------------------|
|              | Cropland Area<br>(10 <sup>3</sup> ha) | Crop Yield<br>(10 <sup>3</sup> t) | Crop Yield/Area<br>(kg/ha) | Cropland Area<br>(10 <sup>3</sup> ha) | Crop Yield<br>(10 <sup>3</sup> t) | Crop Yield/Area<br>(kg/ha) |
| Beijing      | 427                                   | 2,374                             | 5,560                      | 194                                   | 1,138                             | 5,871                      |
| Tianjin      | 451                                   | 2,070                             | 4,585                      | 323                                   | 1,618                             | 5,009                      |
| Hebei        | 7,137                                 | 27,895                            | 3,909                      | 6,302                                 | 32,466                            | 5,151                      |
| Shanxi       | 3,243                                 | 10,771                            | 3,322                      | 3,292                                 | 12,741                            | 3,871                      |
| Inner Mong.  | 4,424                                 | 15,353                            | 3,470                      | 5,589                                 | 25,285                            | 4,524                      |
| Liaoning     | 3,073                                 | 16,601                            | 5,403                      | 3,217                                 | 20,705                            | 6,436                      |
| Jilin        | 3,624                                 | 23,266                            | 6,420                      | 4,610                                 | 33,430                            | 7,251                      |
| Heilongjiang | 7,778                                 | 30,466                            | 3,917                      | 11,520                                | 57,615                            | 5,002                      |
| Shanghai     | 357                                   | 2,263                             | 6,332                      | 188                                   | 1,213                             | 6,465                      |
| Jiangsu      | 5,877                                 | 34,764                            | 5,915                      | 5,337                                 | 33,725                            | 6,320                      |
| Zhejiang     | 2,877                                 | 15,168                            | 5,272                      | 1,252                                 | 7,698                             | 6,151                      |
| Anhui        | 6,028                                 | 26,741                            | 4,436                      | 6,622                                 | 32,891                            | 4,967                      |
| Fujian       | 2,032                                 | 9,522                             | 4,687                      | 1,223                                 | 6,593                             | 5,390                      |
| Jiangxi      | 3,570                                 | 17,663                            | 4,947                      | 3,676                                 | 20,848                            | 5,672                      |
| Shandong     | 8,237                                 | 43,327                            | 5,260                      | 7,202                                 | 45,114                            | 6,264                      |
| Henan        | 8,964                                 | 38,399                            | 4,283                      | 9,985                                 | 56,386                            | 5,647                      |
| Hubei        | 4,880                                 | 24,844                            | 5,091                      | 4,180                                 | 24,418                            | 5,842                      |
| Hunan        | 5,133                                 | 27,015                            | 5,263                      | 4,908                                 | 30,065                            | 6,126                      |
| Guangdong    | 3,524                                 | 18,392                            | 5,219                      | 2,540                                 | 13,963                            | 5,497                      |
| Guangxi      | 3,708                                 | 15,093                            | 4,071                      | 3,069                                 | 14,849                            | 4,838                      |
| Hainan       | 572                                   | 1,977                             | 3,459                      | 439                                   | 1,995                             | 4,549                      |
| Chongqing    | -                                     | -                                 | -                          | 2,260                                 | 11,385                            | 5,039                      |
| Sichuan      | 10,027                                | 44,957                            | 4,484                      | 6,468                                 | 33,150                            | 5,125                      |
| Guizhou      | 2,890                                 | 10,126                            | 3,504                      | 3,054                                 | 10,795                            | 3,534                      |
| Yunnan       | 3,698                                 | 12,462                            | 3,370                      | 4,439                                 | 17,491                            | 3,940                      |
| Tibet        | 192                                   | 777                               | 4,049                      | 171                                   | 950                               | 5,543                      |
| Shannxi      | 4,053                                 | 12,173                            | 3,004                      | 3,128                                 | 12,451                            | 3,981                      |
| Gansu        | 2,925                                 | 8,206                             | 2,805                      | 2,839                                 | 11,097                            | 3,908                      |
| Qinghai      | 395                                   | 1,238                             | 3,136                      | 280                                   | 1,015                             | 3,623                      |
| Ningxia      | 782                                   | 2,579                             | 3,299                      | 828                                   | 3,750                             | 4,528                      |
| Xinjiang     | 1,661                                 | 8,053                             | 4,849                      | 2,131                                 | 12,730                            | 5,973                      |
| Summary      | 112,537                               | 504,535                           | 4,483                      | 111,267                               | 589,571                           | 5,299                      |

\*: Source from Thematic Database for Human-earth System: <http://www.data.ac.cn/index.asp> and National Bureau of Statistics, PR China: <http://www.stats.gov.cn/english/>

**Table S7.** Data inputs for Van Oost et al.'s (2) and modified methods for calculating F3.

| Data Type | Van Oost et al.'s Method                                   |                                           | Modified Method                                            |                                            |
|-----------|------------------------------------------------------------|-------------------------------------------|------------------------------------------------------------|--------------------------------------------|
|           | Data                                                       | Inputs derived                            | Data                                                       | Inputs derived                             |
| SOC       | Vertical distribution of SOC concentration in stable area. | $C_{T-NE}, c_{top-t}$ in equation (10)    | Vertical distribution of SOC concentration in eroded area. | $c_{bel}$ in equation (14)                 |
|           | SOC storage in eroded area                                 | $D_{top}, c_{bel-(t-1)}$ in equation (11) |                                                            | All parameters in equation (16)            |
|           |                                                            | $C_{T-E}$ in equation (10)                |                                                            |                                            |
| Erosion   | Erosion rate                                               | $v_{ero}$ in equation (10)                | Erosion rate                                               | $k_E, v_{ero}$ in equation (14)            |
| Area      | Eroded area                                                | $A_i$ in equation (12)                    | Eroded area                                                | $A$ in equation (15)                       |
| Time      | Length of erosion period                                   | $T$ in equation (12)                      | From when soil profiles are sampled to any year interested | $T$ in equation (15)                       |
| Others    |                                                            |                                           | NPP and carbon pool turnover rate                          | $I_B$ and $k_O$ in equations (13) and (14) |



**Table S8.** Input layers for minimum polygon generation.

| Input layers                                  | Data description                                                                                                                                               | Source                          |
|-----------------------------------------------|----------------------------------------------------------------------------------------------------------------------------------------------------------------|---------------------------------|
| National survey of soil erosion in 1995–1996. | 370,507 polygons covering the ~9,600,000 km <sup>2</sup> land were divided into six grades of Slight, Light, Moderate, Intense, Extremely Intense, and Severe. | Ministry of Water Resources     |
| National survey of soil erosion in 2010–2012. | Areas of the six grades (Slight, Light, Moderate, Intense, Extremely Intense, and Severe) are given for each of the 2,275 counties in China.                   | Ministry of Water Resources     |
| National survey of soil organic matter<br>NPP | 7,251 soil profiles were sampled at 2–9 layers.<br>Extracted from 10 models (see Table S12) with 1°×1° resolution.                                             | Institute of Soil Sciences, CAS |
| Turnover rate of soil carbon pool             | Extracted from 10 models (see Table S12) with 1°×1° resolution.                                                                                                |                                 |

**Table S9.**  $^{137}\text{Cs}$ , carbon inventory of soil profiles, and outputs from Van Oost et al.'s (2) method and present modified method.

| Country  | T   | $D_{\text{samp}}$<br>m | $^{137}\text{C}_{\text{sref}}$<br>Bq m <sup>-2</sup> | $C_0$<br>g/m <sup>3</sup> | $k$<br>m <sup>-1</sup> | $c_{\text{min}}/c_0$<br>- | $k_0$<br>yr <sup>-1</sup> | NPP<br>kg/m <sup>2</sup> /a | $^{137}\text{Cs}$<br>Bq m <sup>-2</sup> | SOC<br>g m <sup>-2</sup> | $v_{\text{ero}}$<br>mm/a | F3-v | F3-m | Ref  |
|----------|-----|------------------------|------------------------------------------------------|---------------------------|------------------------|---------------------------|---------------------------|-----------------------------|-----------------------------------------|--------------------------|--------------------------|------|------|------|
| Spain    | 66  | 0.44                   | 1,870                                                | 8,255                     | 5.00                   | 0.004                     | 0.040                     | 0.10                        | 2,316–6,008                             | 2,997/±1,144             | 3.77                     | 2.5  | 3.5  |      |
| Portugal | 66  | 0.21                   | 1,800                                                | 12,399                    | 7.10                   | 0.085                     | 0.040                     | 0.10                        | 2,163–5,351                             | 2,570/±1,058             | 2.33                     | 5.7  | 2.8  |      |
| UK       | 55  | 0.49                   | 2,500                                                | 16,562                    | 4.30                   | 0.040                     | 0.020                     | 0.10                        | 2,752–6,200                             | 6,630/±1,098             | 2.17                     | 5.2  | 1.9  |      |
| Spain    | 66  | 0.50                   | 1,870                                                | 9,056                     | 5.00                   | 0.050                     | 0.030                     | 0.10                        | 2,264–4,532                             | 3,617/±1,312             | 3.46                     | 3.2  | 1.5  |      |
| Belgium  | 80  | 0.50                   | 3,400                                                | 9,161                     | 4.50                   | 0.060                     | 0.040                     | 0.10                        | 4,212–7,403                             | 3,540/±938               | 2.47                     | 2.4  | 2.2  | (2)  |
| Denmark  | 68  | 0.45                   | 2,430                                                | 21,808                    | 3.90                   | 0.020                     | 0.010                     | 0.10                        | 2,746–4,321                             | 8,461/±938               | 2.25                     | 5.2  | 3.1  |      |
| Belgium  | 100 | 0.50                   | 3,228                                                | 12,225                    | 5.10                   | 0.110                     | 0.030                     | 0.10                        | 3,561–4,430                             | 4,633/±734               | 1.22                     | 1.6  | 1.0  |      |
| Greece   | 74  | 0.20                   | 6,367                                                | 8,465                     | 5.40                   | 0.004                     | 0.070                     | 0.10                        | 7,650–12,853                            | 1,728/±428               | 1.94                     | 0.7  | 0.6  |      |
| USA      | 143 | 0.30                   | 2,470                                                | 32,040                    | 4.20                   | 0.059                     | 0.010                     | 0.10                        | 332–2,684                               | 9,329/±1,951             | 2.43                     | 5.7  | 7.7  |      |
| USA      | 143 | 0.30                   | 2,470                                                | 32,555                    | 4.20                   | 0.059                     | 0.010                     | 0.10                        | 675–2,709                               | 9,480/±1,856             | 2.20                     | 5.7  | 6.4  |      |
| China    | 99  | 0.50                   | 2,377                                                | 22,431                    | 0.83                   | 0.001                     | 0.032                     | 0.44                        | 1,052–1,772                             | 9,284–14,251             | 1.20–3.40                | 4.4  | 4.1  | (13) |
| China    | 70  | 0.80                   | -                                                    | 3,189                     | 5.41                   | 0.420                     | 0.032                     | 0.54                        | -                                       | 1,984                    | 1.75                     | 2.0  | 1.7  | (14) |
| China    | 54  | 0.30                   | 1,769                                                | 11,236                    | 4.20                   | 0.001                     | 0.067                     | 0.74                        | 353–1,539                               | 1,400–4,600              | 0.45–4.35                | 17.2 | 17.8 | (15) |
| China    | 57  | 0.30                   | 1,259                                                | 10,947                    | 4.20                   | 0.001                     | 0.067                     | 0.74                        | 539–1,075                               | 2,200–4,290              | 0.45–2.25                | 6.0  | 4.3  | (16) |
| China    | 50  | 0.30                   | 1,113                                                | 19,822                    | 3.11                   | 0.001                     | 0.083                     | 0.85                        | 158–938                                 | 3,047–6,683              | 0.45–8.20                | 16.5 | 11.9 | (17) |

$D_{\text{samp}}$ : Depth of each sample profile.

$^{137}\text{C}_{\text{sref}}$ :  $^{137}\text{Cs}$  content in the reference profile of each watershed.

$v_{\text{ero}}$ : Erosion velocity.

$c_0$ : SOC content in the surface layer.

$k$ : parameter of vertical distribution of SOC profile, see equation (17).

$c_{\text{min}}/c_0$ : parameter of vertical distribution of SOC profile, see equation (17).

$k_0$ : turnover rate of soil carbon.

NPP: Net Primary Product.

F3-v and F3-m: F3 calculated from Van Oost et al.'s and the modified methods. Unit: g C/m<sup>2</sup>/yr

**Table S10. Validation of CSLE using data from different regions in China**

| Region      | Modeled Erosion Rate (t/hm <sup>2</sup> /yr) | Observed Erosion Rate (t/hm <sup>2</sup> /yr) | Error (%)  | References |
|-------------|----------------------------------------------|-----------------------------------------------|------------|------------|
| North China | 10.80                                        | 8.00                                          | -25.7      | (77)       |
|             | 13.30                                        | 9.90                                          | -25.1      |            |
|             | 48.10                                        | 22.00                                         | -54.2      |            |
|             | 24.50                                        | 8.80                                          | -64.0      |            |
|             | 42.70                                        | 39.80                                         | -6.7       |            |
|             | 21.80                                        | 16.40                                         | -24.7      |            |
|             | 5.60                                         | 7.10                                          | 26.6       |            |
|             | 189.50                                       | 240.40                                        | 26.8       |            |
|             | 33.00                                        | 37.70                                         | 14.1       |            |
|             | 49.60                                        | 48.70                                         | -1.7       |            |
|             | 73.60                                        | 84.30                                         | 14.5       |            |
|             | 72.50                                        | 64.70                                         | -10.8      |            |
|             | 69.00                                        | 80.60                                         | 16.8       |            |
| South China | 53.42                                        | 51.95                                         | -2.8       | (78)       |
|             | 0.12                                         | 0.12                                          | 0.0        |            |
|             | 0.20                                         | 0.18                                          | -10.0      |            |
|             | 0.16                                         | 0.17                                          | 6.3        |            |
|             | 0.06                                         | 0.06                                          | 0.0        |            |
|             | 0.10                                         | 0.09                                          | -10.0      |            |
|             | 25.68                                        | 22.59                                         | -12.0      |            |
|             | 0.08                                         | 0.09                                          | 12.5       |            |
|             | 0.23                                         | 0.24                                          | 4.3        |            |
|             | 7.32                                         | 7.44                                          | 1.6        |            |
|             | 0.21                                         | 0.22                                          | 4.8        |            |
| 0.66        | 0.67                                         | 1.5                                           |            |            |
| Northeast   | 40.10                                        |                                               |            | (79)       |
|             | 53.70                                        |                                               |            |            |
|             | 49.40                                        |                                               |            |            |
|             | 12.10                                        |                                               |            |            |
|             | 33.60                                        |                                               |            |            |
|             | 21.70                                        |                                               | -14.7–7.6  |            |
|             | 21.60                                        |                                               |            |            |
|             | 12.60                                        |                                               |            |            |
|             | 12.00                                        |                                               |            |            |
|             | 23.90                                        |                                               |            |            |
| 31.90       |                                              |                                               |            |            |
| Southwest   | 2.69                                         | 2.56                                          | -4.8       | (80)       |
| East China  | 32.39                                        | 16.47–27.45                                   | -15.3–49.2 | (81)       |

**Table S11.** Summary of graded areas from National Survey of Soil Erosion in 2010–2012 (29)

| Province       | Erosion Area (km <sup>2</sup> ) |          |         |                   |        |
|----------------|---------------------------------|----------|---------|-------------------|--------|
|                | Light                           | Moderate | Intense | Extremely Intense | Severe |
| Beijing        | 1,746                           | 1,031    | 341     | 70                | 14     |
| Tianjin        | 108                             | 60       | 59      | 6                 | 3      |
| Hebei          | 22,397                          | 13,087   | 4,565   | 1,464             | 622    |
| Shanxi         | 26,707                          | 24,172   | 14,069  | 4,277             | 1,058  |
| Inner Mongolia | 68,480                          | 20,300   | 10,118  | 2,923             | 577    |
| Liaoning       | 21,975                          | 12,005   | 6,456   | 2,769             | 783    |
| Jilin          | 17,297                          | 9,044    | 4,342   | 2,777             | 1,284  |
| Heilongjiang   | 36,161                          | 18,343   | 11,657  | 5,459             | 1,631  |
| Shanghai       | 2                               | 2        | 0       | 0                 | 0      |
| Jiangsu        | 2,068                           | 595      | 367     | 133               | 14     |
| Zhejiang       | 6,929                           | 2,060    | 582     | 177               | 159    |
| Anhui          | 6,925                           | 4,207    | 1,953   | 660               | 154    |
| Fujian         | 6,655                           | 3,215    | 1,615   | 428               | 268    |
| Jiangxi        | 14,896                          | 7,558    | 3,158   | 776               | 109    |
| Shandong       | 14,926                          | 6,634    | 3,542   | 1,727             | 424    |
| Henan          | 10,180                          | 7,444    | 4,028   | 1,444             | 368    |
| Hubei          | 20,732                          | 10,272   | 3,637   | 1,573             | 689    |
| Hunan          | 19,615                          | 8,687    | 2,515   | 1,019             | 452    |
| Guangdong      | 8,886                           | 6,925    | 3,535   | 1,629             | 330    |
| Guangxi        | 22,633                          | 14,395   | 7,371   | 4,804             | 1,334  |
| Hainan         | 1,171                           | 666      | 190     | 45                | 44     |
| Chongqing      | 10,644                          | 9,520    | 5,189   | 4,356             | 1,654  |
| Sichuan        | 48,480                          | 35,854   | 15,573  | 9,748             | 4,765  |
| Guizhou        | 27,700                          | 16,356   | 6,012   | 2,960             | 2,241  |
| Yunnan         | 44,876                          | 34,764   | 15,860  | 8,963             | 5,125  |
| Xizang         | 28,650                          | 23,637   | 5,929   | 2,084             | 1,302  |
| Shaanxi        | 48,221                          | 2,124    | 14,679  | 4,569             | 1,214  |
| Gansu          | 30,263                          | 25,455   | 12,866  | 5,407             | 2,121  |
| Qinghai        | 26,563                          | 10,003   | 3,858   | 2,179             | 202    |
| Ningxia        | 6,816                           | 4,281    | 2,065   | 526               | 203    |
| Xinjiang       | 64,895                          | 18,752   | 2,556   | 1,320             | 98     |
| Sum            | 667,597                         | 351,448  | 168,687 | 76,272            | 29,242 |

**Table S12.** Statistics of  $k_o$ , NPP and erosion-induced CO<sub>2</sub> fluxes based on parameters derived from ten land carbon models (see References 31–41).

| Parameter<br>Source  | Average<br>$k_o$<br>1/yr | Average<br>NPP<br>kg C/m <sup>2</sup> /yr | Std.<br>deviation of<br>$k_o$ | Std.<br>deviation of<br>NPP | F3 <sup>b</sup><br>g C/m <sup>2</sup> /yr |      |
|----------------------|--------------------------|-------------------------------------------|-------------------------------|-----------------------------|-------------------------------------------|------|
|                      |                          |                                           |                               |                             | 1                                         | 2    |
|                      |                          |                                           |                               |                             | CLM4C                                     | 0.04 |
| CLM4CN               | 0.04                     | 0.35                                      | 0.03                          | 0.36                        | 40.9                                      | 38.0 |
| HYLAND-v4            | 0.03                     | 0.34                                      | 0.03                          | 0.36                        | 55.4                                      | 42.5 |
| LPJ                  | 0.03                     | 0.30                                      | 0.03                          | 0.25                        | 43.2                                      | 34.2 |
| LPJ_GUESS            | 0.03                     | 0.39                                      | 0.03                          | 0.21                        | 55.5                                      | 38.6 |
| ORCHIDEE             | 0.04                     | 0.42                                      | 0.02                          | 0.35                        | 64.6                                      | 53.2 |
| SDGVM                | 0.03                     | 0.36                                      | 0.03                          | 0.28                        | 50.1                                      | 39.2 |
| TRIFFID              | -0.03                    | 0.36                                      | 0.13                          | 0.46                        | 56.5                                      | 52.8 |
| VEGAS-2.1            | 0.03                     | 0.41                                      | 0.02                          | 0.27                        | 62.0                                      | 51.4 |
| OCN                  | 0.03                     | 0.34                                      | 0.02                          | 0.34                        | 54.7                                      | 50.7 |
| Average <sup>a</sup> |                          |                                           |                               |                             | 51.1                                      | 43.0 |

a: Averaged fluxes calculated from 10 land carbon models.

b: F3(1) is based on the erosion data from the 2<sup>nd</sup> National Survey in 1995–1996; F3(3) is based on the erosion data from the 4<sup>th</sup> National Survey in 2010–2012.

**Table S13.** Summary of parameters used in equations for calculating the five flux components.

| Parameter             | Carbon Flux      | Unit                  | Description                                                                  | Equation                       | Data source                                                                                         |
|-----------------------|------------------|-----------------------|------------------------------------------------------------------------------|--------------------------------|-----------------------------------------------------------------------------------------------------|
| $C_{SOC-top}$         | F1, F3<br>F4, F5 | kg/m <sup>3</sup>     | Organic carbon content in the top 4.5 cm soil layer                          | (1), (16)<br>(17), (19)        | Organic carbon content in the 1 <sup>st</sup> layer of each soil sample in the Global Soil Dataset. |
| $v_{ero}$             | F1, F3<br>F4, F5 | m/yr                  | Erosion rate                                                                 | (1), (13), (14),<br>(17), (19) | Middle point of the range of erosion rate for each grade.                                           |
| $I_B$                 | F3               | gC/m <sup>2</sup> /yr | Carbon input to the soil                                                     | (13), (14)                     | Mean values of NPP from ten global carbon models.                                                   |
| $k_O$                 | F3, F4,<br>F5    | 1/yr                  | Turnover rate of soil carbon                                                 | (13), (14), (20)               | Mean values of $k_O$ from ten global carbon models.                                                 |
| $k_E$                 | F3               | 1/yr                  | Erosion rate of soil carbon                                                  | (14)                           | Erosion rate, $v_{ero}$ , divided by the depth of soil layer which dominates erosion.               |
| $C_{min}/C_{SOC-top}$ | F3               | -                     | Ratio of organic carbon content in the top layer to that in the bottom layer | (16), (17)                     | Fit based on SOC profiles from the Global Soil Dataset following the process in Fig. S2.            |
| $k$                   | F3               | 1/m                   | Attenuation coefficient of SOC profile                                       | (16), (17)                     | Fit based on SOC profiles from the Global Soil Dataset following the process in Fig. S2.            |
